# Supplementary material
Source: PubMed Central journal article supplement (PMC8845038)
Supplement: jama-e222068-s001.pdf [file jama-e222068-s001.pdf]

## Supplemental Online Content

Britton A, Fleming-Dutra KE, Shang N, et al. Association of COVID-19 vaccination with symptomatic SARS-CoV-2 infection by time since vaccination and Delta variant predominance. *JAMA*. doi:10.1001/jama.2022.2068

**eTable 1.** COVID-like Illness Symptoms Collected by Self-report on Questionnaire Administered at Online Test Registration by Pharmacy Chain

**eTable 2.** Unadjusted and Adjusted BNT162b2 Odds Ratios (OR) With 95% Confidence Intervals (CI) by Time Since Second Dose and Age Group, During the Pre-Delta Period (March 13-May 29, 2021)

**eTable 3.** Unadjusted and Adjusted BNT162b2 Odds Ratios (OR) With 95% Confidence Intervals (CI) by Time Since Second Dose and Age Group, During the Intermediate Period (May 30-July 17, 2021)

**eTable 4.** Unadjusted and Adjusted BNT162b2 Odds Ratios (OR) With 95% Confidence Intervals (CI) by Time Since Second Dose and Age Group, During the Delta Period (July 18-October 17, 2021)

**eTable 5.** Unadjusted and Adjusted mRNA-1273 Odds Ratios (OR) With 95% Confidence Intervals (CI) by Time Since Second Dose and Age Group, During the Pre-Delta Period (March 13-May 29, 2021)

**eTable 6.** Unadjusted and Adjusted mRNA-1273 Odds Ratios (OR) With 95% Confidence Intervals (CI) by Time Since Second Dose and Age Group, During the Intermediate Period (May 30-July 17, 2021)

**eTable 7.** Unadjusted and Adjusted mRNA-1273 Odds Ratios (OR) With 95% Confidence Intervals (CI) by Time Since Second Dose and Age Group, During the Delta Period (July 18-October 17, 2021)

**eTable 8.** Unadjusted and Adjusted Ad26.COVS Odds Ratios (OR) With 95% Confidence Intervals (CI) by Time Since Dose and Age Group, During the Pre-Delta Period (March 13-May 29, 2021)

**eTable 9.** Unadjusted and Adjusted Ad26.COVS Odds Ratios (OR) With 95% Confidence Intervals (CI) by Time Since Dose and Age Group, During the Intermediate Period (May 30-July 17, 2021)

**eTable 10.** Unadjusted and Adjusted Ad26.COVS Odds Ratios (OR) With 95% Confidence Intervals (CI) by Time Since Dose and Age Group, During the Delta Period (July 18-October 17, 2021)

**eTable 11.** Comparison of Characteristics of Symptomatic Persons Ages  $\geq 20$  Years Tested for SARS-CoV-2 in *Increasing Community Access to Testing* (ICATT) 2.0 With Laboratory-Based Nucleic Acid Amplification Test (NAAT) With Known and Unknown Vaccination Status—United States, March 13-October 17, 2021

**eTable 12.** Comparison of Characteristics of Symptomatic Persons Ages 12-19 Years Tested for SARS-CoV-2 in *Increasing Community Access to Testing* (2.0) With Laboratory-Based Nucleic Acid Amplification Test (NAAT) With Known and Unknown Vaccination Status—United States, April 15-October 17, 2021 for Ages 16-19 Years and June 15-October 17, 2021 for Ages 12-15 Years

**eTable 13.** Odds Ratios (OR) With 95% Confidence Intervals (CI) for Day 14, Mean of Daily OR Estimates From Days 14-60 (initial OR), and End Day for Figures 2, 3, and 4

**eTable 14.** Significance Testing for Comparisons of Mean of Daily Odds Ratios (OR) Estimates From Days 14-60 After Vaccination (Initial OR) Between Vaccine Products (BNT162b2, mRNA-1273, and Ad26.COVS) and Time Periods (pre-Delta vs. Delta) for Adults Ages  $\geq 20$  Years

**eTable 15.** Characteristics of Included Adolescent Cases and Controls Ages 12-19 Years Tested for SARS-CoV-2 in *Increasing Community Access To Testing* (ICATT) 2.0 -- United States, April 15-October 17, 2021 for Ages 16-19 Years and June 15-October 17, 2021 for Ages 12-15 Years

**eFigure 1.** Sensitivity Analysis Restricting to Tests Performed Through September 23, 2021: Association of BNT162b2 Vaccination and Symptomatic Infection by Day Since Vaccination by Adult Age Group

**eFigure 2.** Sensitivity Analysis Excluding Pharmacy Chain C: Association of COVID-19 Vaccination and Symptomatic Infection by Day Since Vaccination Among Adults Ages  $\geq 20$  Years

**eFigure 3.** Sensitivity Analysis Excluding Pharmacy Chain C: Association of COVID-19 Vaccination and Symptomatic Infection by Day Since Vaccination by Adult Age Group and Vaccine Product

**eFigure 4.** Sensitivity Analysis Excluding Pharmacy Chain C: Association of COVID-19 Vaccination and Symptomatic Infection by Day Since Vaccination by Adolescent Age Group and Vaccine Product

**eFigure 5.** Association of COVID-19 Vaccination and Symptomatic Infection by Day Since Vaccination Among Adults Ages  $\geq 20$  Years During the Intermediate Period (May 30-July 17, 2021)

**eFigure 6.** Association of COVID-19 Vaccination and Symptomatic Infection by Day Since Vaccination by Adult Age Group and Vaccine Product During the Intermediate Period (May 30-July 17, 2021)

This supplemental material has been provided by the authors to give readers additional information about their work.

**eTable 1. COVID-like illness symptoms <sup>a</sup> collected by self-report on questionnaire administered at online test registration by pharmacy chain.**

| <b>Pharmacy chain A</b>       | <b>Pharmacy chain B</b>                     | <b>Pharmacy chain C</b>                                  |
|-------------------------------|---------------------------------------------|----------------------------------------------------------|
| Fever                         | Fever or cough                              | Fever less than 102F or feeling feverish                 |
| Coughing                      | Shortness of breath or difficulty breathing | New or worsening cough                                   |
| Shortness of breath           | Sore throat                                 | Shortness of breath or difficulty breathing (not severe) |
| Recent loss of smell or taste | New loss of taste or smell                  | Sore throat                                              |
| Sore throat                   | Congestion or runny nose                    | New loss of taste or smell                               |
| Chills                        | Unusual fatigue                             | Chills                                                   |
| Repeated shaking with chills  | Muscle or body aches                        | Repeated shaking with chills                             |
| Muscle pain                   | Headache                                    | Muscle pain                                              |
| Headache                      | Nausea or vomiting                          | Headache                                                 |
| Vomiting or diarrhea          | Diarrhea or vomiting                        | Nausea                                                   |
| No symptoms                   | Other symptoms                              | Vomiting                                                 |
|                               | No symptoms                                 | Diarrhea                                                 |
|                               |                                             | None of the above                                        |

<sup>a</sup> Test registrants could select more than one symptom. Data were aggregated when reported such that registrants were identified as either symptomatic ( $\geq 1$  symptom) or asymptomatic (no symptoms or 'none of the above' checked).

**eTable 2. Unadjusted and adjusted <sup>a</sup> BNT162b2 odds ratios (OR) <sup>b</sup> with 95% confidence intervals (CI) by time since second dose and age group, during the pre-Delta period (March 13-May 29, 2021)**

| Age group in years           | Time since second dose (days) | Cases (Positive) | Controls (Negative) | Unadjusted |              |              | Adjusted |              |              |
|------------------------------|-------------------------------|------------------|---------------------|------------|--------------|--------------|----------|--------------|--------------|
|                              |                               |                  |                     | OR         | Lower 95% CI | Upper 95% CI | OR       | Lower 95% CI | Upper 95% CI |
| 16-19                        | 14-30                         | 0                | 126                 | 0          | 0            | NA           | 0        | 0            | NA           |
|                              | 31-60                         | 1                | 88                  | 0.04       | 0.01         | 0.31         | 0.05     | 0.01         | 0.39         |
|                              | 61-90                         | 0                | 14                  | 0          | 0            | NA           | 0        | 0            | NA           |
|                              | 91-120                        | 0                | 2                   | 0          | 0            | NA           | 0        | 0            | NA           |
| 20-44                        | 14-30                         | 25               | 2108                | 0.04       | 0.02         | 0.05         | 0.05     | 0.03         | 0.07         |
|                              | 31-60                         | 66               | 2041                | 0.10       | 0.08         | 0.13         | 0.13     | 0.10         | 0.16         |
|                              | 61-90                         | 67               | 1021                | 0.20       | 0.16         | 0.26         | 0.23     | 0.18         | 0.30         |
|                              | 91-120                        | 28               | 521                 | 0.16       | 0.11         | 0.24         | 0.21     | 0.14         | 0.30         |
|                              | 121-150                       | 0                | 86                  | 0          | 0            | NA           | 0        | 0            | NA           |
| 45-54                        | 14-30                         | 19               | 627                 | 0.07       | 0.04         | 0.11         | 0.09     | 0.05         | 0.14         |
|                              | 31-60                         | 26               | 634                 | 0.09       | 0.06         | 0.14         | 0.12     | 0.08         | 0.18         |
|                              | 61-90                         | 21               | 313                 | 0.15       | 0.10         | 0.24         | 0.19     | 0.12         | 0.30         |
|                              | 91-120                        | 9                | 122                 | 0.17       | 0.08         | 0.33         | 0.19     | 0.09         | 0.39         |
|                              | 121-150                       | 1                | 34                  | 0.07       | 0.01         | 0.49         | 0.10     | 0.01         | 0.77         |
| 55-64                        | 14-30                         | 18               | 620                 | 0.06       | 0.04         | 0.09         | 0.06     | 0.04         | 0.10         |
|                              | 31-60                         | 28               | 709                 | 0.08       | 0.05         | 0.12         | 0.09     | 0.06         | 0.14         |
|                              | 61-90                         | 16               | 260                 | 0.12       | 0.08         | 0.21         | 0.13     | 0.08         | 0.22         |
|                              | 91-120                        | 8                | 106                 | 0.15       | 0.07         | 0.31         | 0.19     | 0.09         | 0.39         |
|                              | 121-150                       | 0                | 18                  | 0          | 0            | NA           | 0        | 0            | NA           |
| ≥65                          | 14-30                         | 22               | 369                 | 0.11       | 0.07         | 0.17         | 0.11     | 0.07         | 0.16         |
|                              | 31-60                         | 40               | 655                 | 0.11       | 0.08         | 0.15         | 0.11     | 0.08         | 0.15         |
|                              | 61-90                         | 26               | 397                 | 0.12       | 0.08         | 0.18         | 0.13     | 0.08         | 0.19         |
|                              | 91-120                        | 6                | 115                 | 0.09       | 0.04         | 0.21         | 0.11     | 0.05         | 0.26         |
|                              | 121-150                       | 0                | 7                   | 0          | 0            | NA           | 0        | 0            | NA           |
| ≥20 (adjusted for age group) | 14-30                         | 84               | 3724                | 0.06       | 0.05         | 0.08         | 0.07     | 0.05         | 0.08         |
|                              | 31-60                         | 160              | 4039                | 0.11       | 0.09         | 0.13         | 0.12     | 0.10         | 0.14         |
|                              | 61-90                         | 130              | 1991                | 0.18       | 0.15         | 0.22         | 0.18     | 0.15         | 0.22         |
|                              | 91-120                        | 51               | 864                 | 0.16       | 0.12         | 0.22         | 0.19     | 0.14         | 0.25         |
|                              | 121-150                       | 1                | 145                 | 0.02       | <0.01        | 0.13         | 0.03     | <0.01        | 0.19         |

OR=odds ratio; CI=Confidence interval; NA=Not applicable

<sup>a</sup> Adjusted for race, ethnicity, sex, testing site state, testing site census tract SVI, and calendar date as a continuous variable. For models for ages ≥20 years, ORs also adjusted for age group. Tests with missing SVI excluded from adjusted analyses.

<sup>b</sup> OR for prior COVID-19 vaccination and SARS-CoV-2 test positivity.

**eTable 3. Unadjusted and adjusted <sup>a</sup> BNT162b2 odds ratios (OR) <sup>b</sup> with 95% confidence intervals (CI) by time since second dose and age group, during the intermediate period (May 30-July 17, 2021)**

| Age group in years           | Time since second dose (days) | Cases (Positive) | Controls (Negative) | Unadjusted |              |              | Adjusted |              |              |
|------------------------------|-------------------------------|------------------|---------------------|------------|--------------|--------------|----------|--------------|--------------|
|                              |                               |                  |                     | OR         | Lower 95% CI | Upper 95% CI | OR       | Lower 95% CI | Upper 95% CI |
| 12-15                        | 14-30                         | 0                | 460                 | 0          | 0            | NA           | 0        | 0            | NA           |
|                              | 31-60                         | 4                | 280                 | 0.07       | 0.03         | 0.19         | 0.06     | 0.02         | 0.16         |
| 16-19                        | 14-30                         | 4                | 334                 | 0.05       | 0.02         | 0.15         | 0.06     | 0.02         | 0.15         |
|                              | 31-60                         | 11               | 913                 | 0.06       | 0.03         | 0.10         | 0.05     | 0.03         | 0.10         |
|                              | 61-90                         | 20               | 672                 | 0.14       | 0.09         | 0.21         | 0.11     | 0.07         | 0.18         |
|                              | 91-120                        | 18               | 165                 | 0.50       | 0.31         | 0.82         | 0.37     | 0.22         | 0.62         |
|                              | 121-150                       | 2                | 25                  | 0.37       | 0.09         | 1.55         | 0.36     | 0.08         | 1.56         |
|                              | 151-180                       | 0                | 9                   | 0          | 0            | NA           | 0        | 0            | NA           |
| 20-44                        | 14-30                         | 20               | 1777                | 0.05       | 0.03         | 0.08         | 0.06     | 0.04         | 0.09         |
|                              | 31-60                         | 153              | 5962                | 0.12       | 0.10         | 0.14         | 0.12     | 0.10         | 0.15         |
|                              | 61-90                         | 409              | 7650                | 0.24       | 0.22         | 0.27         | 0.22     | 0.19         | 0.24         |
|                              | 91-120                        | 293              | 3618                | 0.37       | 0.32         | 0.41         | 0.30     | 0.27         | 0.34         |
|                              | 121-150                       | 92               | 1480                | 0.28       | 0.23         | 0.35         | 0.27     | 0.22         | 0.34         |
|                              | 151-180                       | 87               | 959                 | 0.41       | 0.33         | 0.51         | 0.37     | 0.29         | 0.46         |
|                              | 181-210                       | 22               | 159                 | 0.62       | 0.40         | 0.97         | 0.43     | 0.27         | 0.68         |
| 45-54                        | 14-30                         | 13               | 307                 | 0.17       | 0.10         | 0.30         | 0.18     | 0.10         | 0.32         |
|                              | 31-60                         | 41               | 1161                | 0.14       | 0.10         | 0.19         | 0.15     | 0.11         | 0.21         |
|                              | 61-90                         | 135              | 2108                | 0.26       | 0.21         | 0.31         | 0.24     | 0.20         | 0.29         |
|                              | 91-120                        | 84               | 1097                | 0.31       | 0.24         | 0.39         | 0.27     | 0.21         | 0.34         |
|                              | 121-150                       | 28               | 468                 | 0.24       | 0.16         | 0.35         | 0.24     | 0.16         | 0.36         |
|                              | 151-180                       | 28               | 241                 | 0.46       | 0.31         | 0.69         | 0.42     | 0.28         | 0.64         |
|                              | 181-210                       | 7                | 32                  | 0.88       | 0.39         | 1.99         | 0.75     | 0.32         | 1.74         |
| 55-64                        | 14-30                         | 1                | 211                 | 0.02       | <0.01        | 0.12         | 0.02     | <0.01        | 0.13         |
|                              | 31-60                         | 30               | 836                 | 0.13       | 0.09         | 0.19         | 0.15     | 0.10         | 0.22         |
|                              | 61-90                         | 99               | 1784                | 0.21       | 0.17         | 0.25         | 0.20     | 0.16         | 0.25         |
|                              | 91-120                        | 92               | 1146                | 0.30       | 0.24         | 0.37         | 0.26     | 0.21         | 0.33         |
|                              | 121-150                       | 36               | 406                 | 0.33       | 0.23         | 0.46         | 0.29     | 0.20         | 0.42         |
|                              | 151-180                       | 26               | 178                 | 0.54       | 0.36         | 0.82         | 0.46     | 0.29         | 0.71         |
|                              | 181-210                       | 6                | 32                  | 0.69       | 0.29         | 1.66         | 0.52     | 0.21         | 1.30         |
| ≥65                          | 14-30                         | 1                | 59                  | 0.06       | 0.01         | 0.43         | 0.06     | 0.01         | 0.46         |
|                              | 31-60                         | 11               | 193                 | 0.20       | 0.11         | 0.37         | 0.23     | 0.12         | 0.44         |
|                              | 61-90                         | 43               | 631                 | 0.24       | 0.17         | 0.33         | 0.28     | 0.20         | 0.39         |
|                              | 91-120                        | 76               | 1043                | 0.26       | 0.20         | 0.33         | 0.25     | 0.19         | 0.33         |
|                              | 121-150                       | 88               | 891                 | 0.35       | 0.27         | 0.44         | 0.28     | 0.22         | 0.37         |
|                              | 151-180                       | 30               | 201                 | 0.52       | 0.35         | 0.78         | 0.33     | 0.21         | 0.50         |
|                              | 181-210                       | 2                | 11                  | 0.64       | 0.14         | 2.89         | 0.67     | 0.14         | 3.16         |
| ≥20 (adjusted for age group) | 14-30                         | 35               | 2354                | 0.06       | 0.05         | 0.09         | 0.07     | 0.05         | 0.10         |
|                              | 31-60                         | 235              | 8152                | 0.13       | 0.11         | 0.14         | 0.14     | 0.12         | 0.16         |
|                              | 61-90                         | 686              | 12173               | 0.24       | 0.23         | 0.26         | 0.22     | 0.20         | 0.24         |
|                              | 91-120                        | 545              | 6904                | 0.34       | 0.31         | 0.37         | 0.28     | 0.26         | 0.31         |
|                              | 121-150                       | 244              | 3245                | 0.33       | 0.29         | 0.37         | 0.27     | 0.24         | 0.31         |

| Age group in years           | Time since second dose (days) | Cases (Positive) | Controls (Negative) | Unadjusted |              |              | Adjusted |              |              |
|------------------------------|-------------------------------|------------------|---------------------|------------|--------------|--------------|----------|--------------|--------------|
|                              |                               |                  |                     | OR         | Lower 95% CI | Upper 95% CI | OR       | Lower 95% CI | Upper 95% CI |
| ≥20 (adjusted for age group) | 151-180                       | 171              | 1579                | 0.47       | 0.40         | 0.55         | 0.37     | 0.32         | 0.44         |
|                              | 181-210                       | 37               | 234                 | 0.69       | 0.49         | 0.97         | 0.48     | 0.34         | 0.69         |

OR=odds ratio; CI=Confidence interval; NA=Not applicable

<sup>a</sup> Adjusted for race, ethnicity, sex, testing site state, testing site census tract SVI, and calendar date as a continuous variable. For models for ages ≥20 years, ORs also adjusted for age group. Tests with missing SVI excluded from adjusted analyses.

<sup>b</sup> OR for prior COVID-19 vaccination and SARS-CoV-2 test positivity.

**eTable 4. Unadjusted and adjusted <sup>a</sup> BNT162b2 odds ratios (OR) <sup>b</sup> with 95% confidence intervals (CI) by time since second dose and age group, during the Delta period (July 18-October 17, 2021)**

| Age group in years | Time since second dose (days) | Cases (Positive) | Controls (Negative) | Unadjusted |              |              | Adjusted |              |              |
|--------------------|-------------------------------|------------------|---------------------|------------|--------------|--------------|----------|--------------|--------------|
|                    |                               |                  |                     | OR         | Lower 95% CI | Upper 95% CI | OR       | Lower 95% CI | Upper 95% CI |
| 12-15              | 14-30                         | 43               | 2643                | 0.03       | 0.03         | 0.05         | 0.04     | 0.03         | 0.05         |
|                    | 31-60                         | 173              | 5595                | 0.07       | 0.06         | 0.08         | 0.07     | 0.06         | 0.08         |
|                    | 61-90                         | 278              | 7721                | 0.08       | 0.07         | 0.09         | 0.08     | 0.07         | 0.09         |
|                    | 91-120                        | 227              | 6605                | 0.07       | 0.06         | 0.08         | 0.10     | 0.09         | 0.12         |
|                    | 121-150                       | 38               | 1222                | 0.07       | 0.05         | 0.09         | 0.12     | 0.09         | 0.16         |
| 16-19              | 14-30                         | 53               | 1612                | 0.06       | 0.05         | 0.08         | 0.06     | 0.05         | 0.08         |
|                    | 31-60                         | 238              | 3368                | 0.13       | 0.11         | 0.15         | 0.13     | 0.11         | 0.15         |
|                    | 61-90                         | 470              | 5859                | 0.15       | 0.14         | 0.16         | 0.14     | 0.13         | 0.16         |
|                    | 91-120                        | 807              | 8755                | 0.17       | 0.16         | 0.18         | 0.18     | 0.17         | 0.20         |
|                    | 121-150                       | 581              | 7313                | 0.15       | 0.14         | 0.16         | 0.18     | 0.16         | 0.19         |
|                    | 151-180                       | 243              | 2881                | 0.16       | 0.14         | 0.18         | 0.20     | 0.18         | 0.23         |
|                    | 181-210                       | 70               | 524                 | 0.25       | 0.19         | 0.32         | 0.32     | 0.25         | 0.41         |
|                    | 211-240                       | 18               | 146                 | 0.23       | 0.14         | 0.37         | 0.31     | 0.19         | 0.50         |
| 241-270            | 6                             | 41               | 0.27                | 0.12       | 0.64         | 0.38         | 0.16     | 0.89         |              |
| 20-44              | 14-30                         | 406              | 7059                | 0.10       | 0.09         | 0.12         | 0.11     | 0.10         | 0.12         |
|                    | 31-60                         | 1392             | 13851               | 0.18       | 0.17         | 0.19         | 0.19     | 0.18         | 0.20         |
|                    | 61-90                         | 3518             | 27610               | 0.23       | 0.22         | 0.24         | 0.23     | 0.23         | 0.24         |
|                    | 91-120                        | 7530             | 55660               | 0.25       | 0.24         | 0.25         | 0.25     | 0.25         | 0.26         |
|                    | 121-150                       | 8441             | 59618               | 0.26       | 0.25         | 0.26         | 0.28     | 0.27         | 0.29         |
|                    | 151-180                       | 5736             | 40841               | 0.26       | 0.25         | 0.26         | 0.29     | 0.29         | 0.30         |
|                    | 181-210                       | 2930             | 18897               | 0.28       | 0.27         | 0.29         | 0.33     | 0.32         | 0.34         |
|                    | 211-240                       | 1509             | 9185                | 0.30       | 0.28         | 0.32         | 0.36     | 0.34         | 0.38         |
|                    | 241-270                       | 539              | 3509                | 0.28       | 0.26         | 0.31         | 0.36     | 0.33         | 0.39         |
| 271-300            | 58                            | 363              | 0.29                | 0.22       | 0.38         | 0.41         | 0.31     | 0.55         |              |
| 45-54              | 14-30                         | 128              | 1388                | 0.14       | 0.12         | 0.17         | 0.14     | 0.12         | 0.17         |
|                    | 31-60                         | 342              | 2605                | 0.20       | 0.18         | 0.23         | 0.21     | 0.18         | 0.23         |
|                    | 61-90                         | 875              | 5437                | 0.25       | 0.23         | 0.27         | 0.26     | 0.24         | 0.28         |
|                    | 91-120                        | 2320             | 13078               | 0.27       | 0.26         | 0.29         | 0.29     | 0.27         | 0.30         |
|                    | 121-150                       | 3012             | 16657               | 0.28       | 0.27         | 0.29         | 0.29     | 0.28         | 0.30         |
|                    | 151-180                       | 2348             | 12453               | 0.29       | 0.28         | 0.30         | 0.31     | 0.29         | 0.32         |
|                    | 181-210                       | 1202             | 6058                | 0.31       | 0.29         | 0.33         | 0.34     | 0.32         | 0.36         |
|                    | 211-240                       | 550              | 2634                | 0.32       | 0.29         | 0.35         | 0.36     | 0.33         | 0.40         |
|                    | 241-270                       | 204              | 876                 | 0.36       | 0.31         | 0.42         | 0.41     | 0.35         | 0.48         |
| 271-300            | 21                            | 92               | 0.35                | 0.22       | 0.57         | 0.40         | 0.25     | 0.65         |              |
| 55-64              | 14-30                         | 69               | 765                 | 0.13       | 0.10         | 0.17         | 0.13     | 0.10         | 0.17         |
|                    | 31-60                         | 173              | 1461                | 0.17       | 0.15         | 0.20         | 0.18     | 0.15         | 0.21         |
|                    | 61-90                         | 543              | 3267                | 0.24       | 0.22         | 0.26         | 0.26     | 0.23         | 0.28         |
|                    | 91-120                        | 1965             | 10424               | 0.27       | 0.26         | 0.29         | 0.30     | 0.28         | 0.31         |
|                    | 121-150                       | 3193             | 16258               | 0.28       | 0.27         | 0.30         | 0.30     | 0.29         | 0.31         |
|                    | 151-180                       | 2739             | 13241               | 0.30       | 0.29         | 0.31         | 0.31     | 0.30         | 0.33         |
| 181-210            | 1396                          | 6399             | 0.32                | 0.30       | 0.34         | 0.33         | 0.31     | 0.36         |              |

|                              |                               |                  |                     | Unadjusted |              |              | Adjusted |              |              |
|------------------------------|-------------------------------|------------------|---------------------|------------|--------------|--------------|----------|--------------|--------------|
| Age group in years           | Time since second dose (days) | Cases (Positive) | Controls (Negative) | OR         | Lower 95% CI | Upper 95% CI | OR       | Lower 95% CI | Upper 95% CI |
| 55-64                        | 211-240                       | 499              | 2304                | 0.31       | 0.28         | 0.35         | 0.35     | 0.31         | 0.38         |
|                              | 241-270                       | 150              | 701                 | 0.31       | 0.26         | 0.37         | 0.33     | 0.28         | 0.40         |
|                              | 271-300                       | 6                | 52                  | 0.17       | 0.07         | 0.39         | 0.19     | 0.08         | 0.45         |
| ≥65                          | 14-30                         | 51               | 260                 | 0.28       | 0.21         | 0.38         | 0.27     | 0.20         | 0.37         |
|                              | 31-60                         | 93               | 503                 | 0.26       | 0.21         | 0.33         | 0.27     | 0.21         | 0.34         |
|                              | 61-90                         | 167              | 888                 | 0.27       | 0.23         | 0.32         | 0.28     | 0.24         | 0.34         |
|                              | 91-120                        | 522              | 2461                | 0.30       | 0.27         | 0.33         | 0.34     | 0.31         | 0.38         |
|                              | 121-150                       | 1604             | 7523                | 0.30       | 0.28         | 0.32         | 0.35     | 0.32         | 0.37         |
|                              | 151-180                       | 2772             | 11499               | 0.34       | 0.32         | 0.36         | 0.36     | 0.34         | 0.38         |
|                              | 181-210                       | 2447             | 9484                | 0.37       | 0.35         | 0.39         | 0.35     | 0.33         | 0.37         |
|                              | 211-240                       | 974              | 3666                | 0.38       | 0.35         | 0.41         | 0.33     | 0.30         | 0.36         |
|                              | 241-270                       | 105              | 514                 | 0.29       | 0.23         | 0.36         | 0.25     | 0.20         | 0.31         |
| 271-300                      | 1                             | 25               | 0.06                | 0.01       | 0.42         | 0.06         | 0.01     | 0.43         |              |
| ≥20 (adjusted for age group) | 14-30                         | 654              | 9472                | 0.12       | 0.11         | 0.13         | 0.12     | 0.11         | 0.13         |
|                              | 31-60                         | 2000             | 18420               | 0.19       | 0.18         | 0.20         | 0.19     | 0.18         | 0.20         |
|                              | 61-90                         | 5103             | 37202               | 0.24       | 0.23         | 0.25         | 0.24     | 0.24         | 0.25         |
|                              | 91-120                        | 12337            | 81623               | 0.26       | 0.26         | 0.27         | 0.26     | 0.26         | 0.27         |
|                              | 121-150                       | 16250            | 100056              | 0.28       | 0.28         | 0.29         | 0.28     | 0.28         | 0.29         |
|                              | 151-180                       | 13595            | 78034               | 0.30       | 0.30         | 0.31         | 0.31     | 0.30         | 0.31         |
|                              | 181-210                       | 7975             | 40838               | 0.34       | 0.33         | 0.35         | 0.34     | 0.33         | 0.35         |
|                              | 211-240                       | 3532             | 17789               | 0.35       | 0.33         | 0.36         | 0.37     | 0.35         | 0.38         |
|                              | 241-270                       | 998              | 5600                | 0.31       | 0.29         | 0.33         | 0.36     | 0.34         | 0.39         |
| 271-300                      | 86                            | 532              | 0.28                | 0.22       | 0.35         | 0.36         | 0.29     | 0.46         |              |

OR=odds ratio; CI=Confidence interval

<sup>a</sup> Adjusted for race, ethnicity, sex, testing site state, testing site census tract SVI, and calendar date as a continuous variable. For models for ages ≥20 years, ORs also adjusted for age group. Tests with missing SVI excluded from adjusted analyses.

<sup>b</sup> OR for prior COVID-19 vaccination and SARS-CoV-2 test positivity.



**eTable 5. Unadjusted and adjusted <sup>a</sup> mRNA-1273 odds ratios (OR) <sup>b</sup> with 95% confidence intervals (CI) by time since second dose and age group, during the pre-Delta period (March 13-May 29, 2021)**

| Age group in years          | Time since second dose (days) | Cases (Positive) | Controls (Negative) | Unadjusted |              |              | Adjusted |              |              |
|-----------------------------|-------------------------------|------------------|---------------------|------------|--------------|--------------|----------|--------------|--------------|
|                             |                               |                  |                     | OR         | Lower 95% CI | Upper 95% CI | OR       | Lower 95% CI | Upper 95% CI |
| 16-19                       | 14-30                         | 0                | 33                  | 0          | 0            | NA           | 0        | 0            | NA           |
|                             | 31-60                         | 0                | 29                  | 0          | 0            | NA           | 0        | 0            | NA           |
|                             | 61-90                         | 0                | 16                  | 0          | 0            | NA           | 0        | 0            | NA           |
|                             | 91-120                        | 0                | 8                   | 0          | 0            | NA           | 0        | 0            | NA           |
| 20-44                       | 14-30                         | 5                | 1229                | 0.01       | 0.01         | 0.03         | 0.02     | 0.01         | 0.04         |
|                             | 31-60                         | 25               | 1663                | 0.05       | 0.03         | 0.07         | 0.05     | 0.04         | 0.08         |
|                             | 61-90                         | 30               | 1055                | 0.09       | 0.06         | 0.12         | 0.11     | 0.07         | 0.15         |
|                             | 91-120                        | 7                | 388                 | 0.06       | 0.03         | 0.12         | 0.08     | 0.04         | 0.17         |
|                             | 121-150                       | 0                | 10                  | 0          | 0            | NA           | 0        | 0            | NA           |
| 45-54                       | 14-30                         | 8                | 406                 | 0.04       | 0.02         | 0.09         | 0.05     | 0.03         | 0.10         |
|                             | 31-60                         | 12               | 582                 | 0.05       | 0.03         | 0.08         | 0.06     | 0.03         | 0.10         |
|                             | 61-90                         | 12               | 325                 | 0.08       | 0.05         | 0.15         | 0.11     | 0.06         | 0.19         |
|                             | 91-120                        | 2                | 101                 | 0.04       | 0.01         | 0.18         | 0.07     | 0.02         | 0.27         |
|                             | 121-150                       | 0                | 3                   | 0          | 0            | NA           | 0        | 0            | NA           |
| 55-64                       | 14-30                         | 5                | 481                 | 0.02       | 0.01         | 0.05         | 0.02     | 0.01         | 0.06         |
|                             | 31-60                         | 9                | 539                 | 0.03       | 0.02         | 0.07         | 0.04     | 0.02         | 0.08         |
|                             | 61-90                         | 9                | 345                 | 0.05       | 0.03         | 0.10         | 0.06     | 0.03         | 0.12         |
|                             | 91-120                        | 4                | 86                  | 0.09       | 0.03         | 0.26         | 0.12     | 0.04         | 0.34         |
|                             | 121-150                       | 0                | 2                   | 0          | 0            | NA           | 0        | 0            | NA           |
| ≥65                         | 14-30                         | 16               | 454                 | 0.06       | 0.04         | 0.11         | 0.06     | 0.04         | 0.10         |
|                             | 31-60                         | 20               | 816                 | 0.04       | 0.03         | 0.07         | 0.04     | 0.03         | 0.07         |
|                             | 61-90                         | 7                | 456                 | 0.03       | 0.01         | 0.06         | 0.03     | 0.02         | 0.07         |
|                             | 91-120                        | 1                | 76                  | 0.02       | 0            | 0.17         | 0.03     | 0            | 0.20         |
|                             | 121-150                       | 0                | 1                   | 0          | 0            | NA           | 0        | 0            | NA           |
| ≥20 (adjusted by age group) | 14-30                         | 34               | 2570                | 0.04       | 0.03         | 0.05         | 0.04     | 0.03         | 0.05         |
|                             | 31-60                         | 66               | 3600                | 0.05       | 0.04         | 0.06         | 0.05     | 0.04         | 0.06         |
|                             | 61-90                         | 58               | 2181                | 0.07       | 0.06         | 0.10         | 0.08     | 0.06         | 0.10         |
|                             | 91-120                        | 14               | 651                 | 0.06       | 0.04         | 0.10         | 0.08     | 0.05         | 0.13         |
|                             | 121-150                       | 0                | 16                  | 0          | 0            | NA           | 0        | 0            | NA           |

OR=odds ratio; CI=Confidence interval; NA=Not applicable

<sup>a</sup> Adjusted for race, ethnicity, sex, testing site state, testing site census tract SVI, and calendar date as a continuous variable. For models for ages ≥20 years, ORs also adjusted for age group. Tests with missing SVI excluded from adjusted analyses.

<sup>b</sup> OR for prior COVID-19 vaccination and SARS-CoV-2 test positivity.

**eTable 6. Unadjusted and adjusted <sup>a</sup> mRNA-1273 odds ratios (OR) <sup>b</sup> with 95% confidence intervals (CI) by time since second dose and age group, during the intermediate period (May 30-July 17, 2021)**

| Age group in years          | Time since second dose (days) | Cases (Positive) | Controls (Negative) | Unadjusted |              |              | Adjusted |              |              |
|-----------------------------|-------------------------------|------------------|---------------------|------------|--------------|--------------|----------|--------------|--------------|
|                             |                               |                  |                     | OR         | Lower 95% CI | Upper 95% CI | OR       | Lower 95% CI | Upper 95% CI |
| 16-19                       | 14-30                         | 0                | 91                  | 0          | 0            | NA           | 0        | 0            | NA           |
|                             | 31-60                         | 3                | 250                 | 0.06       | 0.02         | 0.17         | 0.05     | 0.02         | 0.17         |
|                             | 61-90                         | 6                | 163                 | 0.17       | 0.07         | 0.38         | 0.15     | 0.06         | 0.34         |
|                             | 91-120                        | 1                | 69                  | 0.07       | 0.01         | 0.48         | 0.05     | 0.01         | 0.38         |
|                             | 121-150                       | 1                | 18                  | 0.26       | 0.03         | 1.91         | 0.20     | 0.03         | 1.53         |
|                             | 151-180                       | 0                | 7                   | 0          | 0            | NA           | 0        | 0            | NA           |
| 20-44                       | 14-30                         | 10               | 1106                | 0.04       | 0.02         | 0.08         | 0.05     | 0.03         | 0.09         |
|                             | 31-60                         | 66               | 3759                | 0.08       | 0.06         | 0.10         | 0.08     | 0.06         | 0.10         |
|                             | 61-90                         | 129              | 4084                | 0.14       | 0.12         | 0.17         | 0.12     | 0.10         | 0.15         |
|                             | 91-120                        | 89               | 2154                | 0.19       | 0.15         | 0.23         | 0.17     | 0.14         | 0.21         |
|                             | 121-150                       | 81               | 1664                | 0.22       | 0.18         | 0.27         | 0.21     | 0.17         | 0.27         |
|                             | 151-180                       | 44               | 528                 | 0.38       | 0.28         | 0.51         | 0.30     | 0.22         | 0.41         |
|                             | 181-210                       | 0                | 2                   | 0          | 0            | NA           | 0        | 0            | NA           |
| 45-54                       | 14-30                         | 3                | 252                 | 0.05       | 0.02         | 0.15         | 0.06     | 0.02         | 0.18         |
|                             | 31-60                         | 20               | 868                 | 0.09       | 0.06         | 0.14         | 0.10     | 0.06         | 0.15         |
|                             | 61-90                         | 40               | 1172                | 0.14       | 0.10         | 0.19         | 0.13     | 0.10         | 0.18         |
|                             | 91-120                        | 28               | 648                 | 0.17       | 0.12         | 0.25         | 0.16     | 0.11         | 0.24         |
|                             | 121-150                       | 27               | 521                 | 0.21       | 0.14         | 0.31         | 0.21     | 0.14         | 0.31         |
|                             | 151-180                       | 19               | 176                 | 0.43       | 0.27         | 0.70         | 0.39     | 0.24         | 0.63         |
|                             | 181-210                       | 0                | 1                   | 0          | 0            | NA           | 0        | 0            | NA           |
| 55-64                       | 14-30                         | 0                | 143                 | 0          | 0            | NA           | 0        | 0            | NA           |
|                             | 31-60                         | 9                | 711                 | 0.05       | 0.02         | 0.09         | 0.05     | 0.03         | 0.10         |
|                             | 61-90                         | 42               | 1231                | 0.13       | 0.09         | 0.17         | 0.13     | 0.09         | 0.17         |
|                             | 91-120                        | 32               | 778                 | 0.15       | 0.11         | 0.22         | 0.15     | 0.10         | 0.22         |
|                             | 121-150                       | 24               | 482                 | 0.18       | 0.12         | 0.28         | 0.17     | 0.11         | 0.27         |
|                             | 151-180                       | 9                | 128                 | 0.26       | 0.13         | 0.51         | 0.22     | 0.11         | 0.45         |
|                             | 181-210                       | 0                | 1                   | 0          | 0            | NA           | 0        | 0            | NA           |
| ≥65                         | 14-30                         | 1                | 57                  | 0.06       | 0.01         | 0.45         | 0.07     | 0.01         | 0.49         |
|                             | 31-60                         | 6                | 207                 | 0.10       | 0.04         | 0.23         | 0.14     | 0.06         | 0.31         |
|                             | 61-90                         | 20               | 557                 | 0.13       | 0.08         | 0.20         | 0.14     | 0.09         | 0.23         |
|                             | 91-120                        | 52               | 1155                | 0.16       | 0.12         | 0.21         | 0.16     | 0.12         | 0.22         |
|                             | 121-150                       | 60               | 853                 | 0.25       | 0.19         | 0.33         | 0.21     | 0.15         | 0.28         |
|                             | 151-180                       | 7                | 123                 | 0.20       | 0.09         | 0.43         | 0.14     | 0.06         | 0.31         |
| ≥20 (adjusted by age group) | 14-30                         | 14               | 1558                | 0.04       | 0.02         | 0.07         | 0.05     | 0.03         | 0.08         |
|                             | 31-60                         | 101              | 5545                | 0.08       | 0.06         | 0.10         | 0.08     | 0.07         | 0.10         |
|                             | 61-90                         | 231              | 7044                | 0.14       | 0.12         | 0.16         | 0.13     | 0.11         | 0.15         |
|                             | 91-120                        | 201              | 4735                | 0.18       | 0.16         | 0.21         | 0.16     | 0.14         | 0.19         |
|                             | 121-150                       | 192              | 3520                | 0.24       | 0.20         | 0.27         | 0.20     | 0.17         | 0.23         |
|                             | 151-180                       | 79               | 955                 | 0.36       | 0.29         | 0.45         | 0.27     | 0.21         | 0.34         |
|                             | 181-210                       | 0                | 4                   | 0          | 0            | NA           | 0        | 0            | NA           |

OR=odds ratio; CI=Confidence interval; NA=Not applicable

<sup>a</sup> Adjusted for race, ethnicity, sex, testing site state, testing site census tract SVI, and calendar date as a continuous variable. For models for ages  $\geq 20$  years, ORs also adjusted for age group. Tests with missing SVI excluded from adjusted analyses.

<sup>b</sup> OR for prior COVID-19 vaccination and SARS-CoV-2 test positivity.

**eTable 7. Unadjusted and adjusted <sup>a</sup> mRNA-1273 odds ratios (OR) <sup>b</sup> with 95% confidence intervals (CI) by time since second dose and age group, during the Delta period (July 18-October 17, 2021)**

| Age group in years | Time since second dose (days) | Cases (Positive) | Controls (Negative) | Unadjusted |              |              | Adjusted |              |              |
|--------------------|-------------------------------|------------------|---------------------|------------|--------------|--------------|----------|--------------|--------------|
|                    |                               |                  |                     | OR         | Lower 95% CI | Upper 95% CI | OR       | Lower 95% CI | Upper 95% CI |
| 16-19              | 14-30                         | 2                | 208                 | 0.02       | <0.01        | 0.07         | 0.02     | <0.01        | 0.08         |
|                    | 31-60                         | 28               | 586                 | 0.09       | 0.06         | 0.13         | 0.09     | 0.06         | 0.13         |
|                    | 61-90                         | 96               | 1143                | 0.16       | 0.13         | 0.19         | 0.15     | 0.12         | 0.18         |
|                    | 91-120                        | 124              | 1583                | 0.15       | 0.12         | 0.17         | 0.15     | 0.13         | 0.18         |
|                    | 121-150                       | 96               | 1216                | 0.15       | 0.12         | 0.18         | 0.17     | 0.14         | 0.21         |
|                    | 151-180                       | 50               | 607                 | 0.15       | 0.11         | 0.20         | 0.18     | 0.14         | 0.25         |
|                    | 181-210                       | 22               | 193                 | 0.21       | 0.14         | 0.33         | 0.26     | 0.17         | 0.41         |
|                    | 211-240                       | 6                | 73                  | 0.15       | 0.07         | 0.35         | 0.21     | 0.09         | 0.47         |
| 241-270            | 1                             | 20               | 0.09                | 0.01       | 0.69         | 0.14         | 0.02     | 1.01         |              |
| 20-44              | 14-30                         | 118              | 2861                | 0.08       | 0.06         | 0.09         | 0.08     | 0.06         | 0.09         |
|                    | 31-60                         | 448              | 7220                | 0.11       | 0.10         | 0.12         | 0.11     | 0.10         | 0.13         |
|                    | 61-90                         | 1464             | 17794               | 0.15       | 0.14         | 0.16         | 0.15     | 0.14         | 0.16         |
|                    | 91-120                        | 3027             | 33901               | 0.16       | 0.16         | 0.17         | 0.17     | 0.16         | 0.17         |
|                    | 121-150                       | 3338             | 34589               | 0.18       | 0.17         | 0.18         | 0.19     | 0.19         | 0.20         |
|                    | 151-180                       | 2651             | 26049               | 0.19       | 0.18         | 0.19         | 0.21     | 0.20         | 0.22         |
|                    | 181-210                       | 1815             | 15043               | 0.22       | 0.21         | 0.23         | 0.26     | 0.25         | 0.27         |
|                    | 211-240                       | 944              | 7598                | 0.23       | 0.21         | 0.24         | 0.28     | 0.27         | 0.31         |
| 241-270            | 277                           | 1755             | 0.29                | 0.25       | 0.33         | 0.38         | 0.34     | 0.43         |              |
| 271-300            | 2                             | 10               | 0.36                | 0.08       | 1.66         | 0.43         | 0.09     | 1.99         |              |
| 45-54              | 14-30                         | 29               | 584                 | 0.08       | 0.05         | 0.11         | 0.08     | 0.05         | 0.11         |
|                    | 31-60                         | 117              | 1466                | 0.12       | 0.10         | 0.15         | 0.13     | 0.10         | 0.15         |
|                    | 61-90                         | 350              | 3721                | 0.14       | 0.13         | 0.16         | 0.15     | 0.14         | 0.17         |
|                    | 91-120                        | 957              | 8651                | 0.17       | 0.16         | 0.18         | 0.18     | 0.17         | 0.19         |
|                    | 121-150                       | 1158             | 10250               | 0.17       | 0.16         | 0.19         | 0.18     | 0.17         | 0.19         |
|                    | 151-180                       | 1076             | 8482                | 0.20       | 0.18         | 0.21         | 0.21     | 0.20         | 0.23         |
|                    | 181-210                       | 716              | 4927                | 0.22       | 0.21         | 0.24         | 0.25     | 0.23         | 0.27         |
|                    | 211-240                       | 393              | 2490                | 0.24       | 0.22         | 0.27         | 0.28     | 0.25         | 0.31         |
| 241-270            | 90                            | 540              | 0.26                | 0.21       | 0.32         | 0.3          | 0.24     | 0.38         |              |
| 271-300            | 0                             | 4                | 0                   | 0          | NA           | 0            | 0        | NA           |              |
| 55-64              | 14-30                         | 22               | 365                 | 0.09       | 0.06         | 0.13         | 0.08     | 0.05         | 0.13         |
|                    | 31-60                         | 74               | 923                 | 0.12       | 0.09         | 0.15         | 0.12     | 0.10         | 0.15         |
|                    | 61-90                         | 288              | 2655                | 0.16       | 0.14         | 0.18         | 0.17     | 0.15         | 0.19         |
|                    | 91-120                        | 809              | 7593                | 0.15       | 0.14         | 0.17         | 0.16     | 0.15         | 0.18         |
|                    | 121-150                       | 1341             | 10660               | 0.18       | 0.17         | 0.19         | 0.19     | 0.18         | 0.20         |
|                    | 151-180                       | 1227             | 9496                | 0.19       | 0.18         | 0.20         | 0.20     | 0.18         | 0.21         |
|                    | 181-210                       | 713              | 5094                | 0.20       | 0.19         | 0.22         | 0.22     | 0.20         | 0.24         |
|                    | 211-240                       | 321              | 2267                | 0.20       | 0.18         | 0.23         | 0.23     | 0.20         | 0.26         |
| 241-270            | 91                            | 468              | 0.28                | 0.22       | 0.35         | 0.31         | 0.24     | 0.39         |              |
| 271-300            | 0                             | 1                | 0                   | 0          | NA           | 0            | 0        | NA           |              |
| ≥65                | 14-30                         | 10               | 105                 | 0.14       | 0.07         | 0.26         | 0.13     | 0.07         | 0.25         |
|                    | 31-60                         | 40               | 254                 | 0.22       | 0.16         | 0.31         | 0.23     | 0.17         | 0.33         |

| Age group in years           | Time since second dose (days) | Cases (Positive) | Controls (Negative) | Unadjusted |              |              | Adjusted |              |              |
|------------------------------|-------------------------------|------------------|---------------------|------------|--------------|--------------|----------|--------------|--------------|
|                              |                               |                  |                     | OR         | Lower 95% CI | Upper 95% CI | OR       | Lower 95% CI | Upper 95% CI |
| ≥65                          | 61-90                         | 100              | 648                 | 0.22       | 0.18         | 0.27         | 0.24     | 0.19         | 0.29         |
|                              | 91-120                        | 313              | 2366                | 0.19       | 0.17         | 0.21         | 0.22     | 0.19         | 0.24         |
|                              | 121-150                       | 955              | 7175                | 0.19       | 0.17         | 0.20         | 0.22     | 0.20         | 0.23         |
|                              | 151-180                       | 1740             | 11383               | 0.22       | 0.20         | 0.23         | 0.23     | 0.22         | 0.24         |
|                              | 181-210                       | 1484             | 8768                | 0.24       | 0.22         | 0.26         | 0.22     | 0.21         | 0.24         |
|                              | 211-240                       | 637              | 3554                | 0.25       | 0.23         | 0.28         | 0.22     | 0.19         | 0.24         |
|                              | 241-270                       | 64               | 322                 | 0.28       | 0.22         | 0.37         | 0.22     | 0.17         | 0.29         |
|                              | 271-300                       | 0                | 1                   | 0          | 0            | NA           | 0        | 0            | NA           |
| ≥20 (adjusted for age group) | 14-30                         | 179              | 3915                | 0.08       | 0.07         | 0.09         | 0.08     | 0.07         | 0.09         |
|                              | 31-60                         | 679              | 9863                | 0.12       | 0.11         | 0.13         | 0.12     | 0.11         | 0.13         |
|                              | 61-90                         | 2202             | 24818               | 0.15       | 0.15         | 0.16         | 0.16     | 0.15         | 0.16         |
|                              | 91-120                        | 5106             | 52511               | 0.17       | 0.16         | 0.17         | 0.17     | 0.16         | 0.17         |
|                              | 121-150                       | 6792             | 62674               | 0.19       | 0.18         | 0.19         | 0.19     | 0.19         | 0.19         |
|                              | 151-180                       | 6694             | 55410               | 0.21       | 0.20         | 0.22         | 0.21     | 0.21         | 0.22         |
|                              | 181-210                       | 4728             | 33832               | 0.24       | 0.24         | 0.25         | 0.25     | 0.24         | 0.26         |
|                              | 211-240                       | 2295             | 15909               | 0.25       | 0.24         | 0.26         | 0.27     | 0.26         | 0.29         |
|                              | 241-270                       | 522              | 3085                | 0.29       | 0.27         | 0.32         | 0.35     | 0.32         | 0.38         |
|                              | 271-300                       | 2                | 16                  | 0.22       | 0.05         | 0.95         | 0.26     | 0.06         | 1.13         |

OR=odds ratio; CI=Confidence interval; NA=Not applicable

<sup>a</sup> Adjusted for race, ethnicity, sex, testing site state, testing site census tract SVI, and calendar date as a continuous variable. For models for ages ≥20 years, ORs also adjusted for age group. Tests with missing SVI excluded from adjusted analyses.

<sup>b</sup> OR for prior COVID-19 vaccination and SARS-CoV-2 test positivity.

**eTable 8. Unadjusted and adjusted <sup>a</sup> Ad26.CO2V.S odds ratios (OR) <sup>b</sup> with 95% confidence intervals (CI) by time since dose and age group, during the pre-Delta period (March 13-May 29, 2021)**

| Age group in years           | Time since dose (days) | Cases (Positive) | Controls (Negative) | Unadjusted |              |              | Adjusted |              |              |
|------------------------------|------------------------|------------------|---------------------|------------|--------------|--------------|----------|--------------|--------------|
|                              |                        |                  |                     | OR         | Lower 95% CI | Upper 95% CI | OR       | Lower 95% CI | Upper 95% CI |
| 16-19                        | 14-30                  | 0                | 8                   | 0          | 0            | NA           | 0        | 0            | NA           |
|                              | 31-60                  | 0                | 21                  | 0          | 0            | NA           | 0        | 0            | NA           |
|                              | 61-90                  | 1                | 2                   | 1.89       | 0.17         | 20.83        | 1.72     | 0.15         | 20.22        |
| 20-44                        | 14-30                  | 91               | 570                 | 0.49       | 0.39         | 0.61         | 0.52     | 0.42         | 0.65         |
|                              | 31-60                  | 65               | 659                 | 0.30       | 0.23         | 0.39         | 0.39     | 0.30         | 0.50         |
|                              | 61-90                  | 9                | 114                 | 0.24       | 0.12         | 0.48         | 0.36     | 0.18         | 0.71         |
| 45-54                        | 14-30                  | 39               | 186                 | 0.47       | 0.34         | 0.67         | 0.48     | 0.34         | 0.69         |
|                              | 31-60                  | 34               | 211                 | 0.36       | 0.25         | 0.52         | 0.44     | 0.31         | 0.64         |
|                              | 61-90                  | 4                | 44                  | 0.21       | 0.07         | 0.57         | 0.30     | 0.11         | 0.84         |
| 55-64                        | 14-30                  | 34               | 168                 | 0.41       | 0.28         | 0.59         | 0.40     | 0.28         | 0.58         |
|                              | 31-60                  | 24               | 190                 | 0.26       | 0.17         | 0.39         | 0.27     | 0.18         | 0.42         |
|                              | 61-90                  | 3                | 42                  | 0.14       | 0.04         | 0.47         | 0.18     | 0.06         | 0.60         |
| ≥65                          | 14-30                  | 15               | 40                  | 0.68       | 0.37         | 1.23         | 0.68     | 0.37         | 1.25         |
|                              | 31-60                  | 19               | 65                  | 0.53       | 0.32         | 0.88         | 0.56     | 0.33         | 0.95         |
|                              | 61-90                  | 3                | 17                  | 0.32       | 0.09         | 1.09         | 0.37     | 0.10         | 1.28         |
| ≥20 (adjusted for age group) | 14-30                  | 179              | 964                 | 0.52       | 0.44         | 0.60         | 0.50     | 0.42         | 0.58         |
|                              | 31-60                  | 142              | 1125                | 0.35       | 0.29         | 0.42         | 0.39     | 0.33         | 0.47         |
|                              | 61-90                  | 19               | 217                 | 0.24       | 0.15         | 0.39         | 0.31     | 0.20         | 0.50         |

OR=odds ratio; CI=Confidence interval; NA=Not applicable

<sup>a</sup> Adjusted for race, ethnicity, sex, testing site state, testing site census tract SVI, and calendar date as a continuous variable. For models for ages ≥20 years, ORs also adjusted for age group. Tests with missing SVI excluded from adjusted analyses.

<sup>b</sup> OR for prior COVID-19 vaccination and SARS-CoV-2 test positivity.

**eTable 9. Unadjusted and adjusted <sup>a</sup> Ad26.CO2V.S odds ratios (OR) <sup>b</sup> with 95% confidence intervals (CI) by time since dose and age group, during the intermediate period (May 30-July 17, 2021)**

| Age group in years           | Time since dose (days) | Cases (Positive) | Controls (Negative) | Unadjusted |              |              | Adjusted |              |              |
|------------------------------|------------------------|------------------|---------------------|------------|--------------|--------------|----------|--------------|--------------|
|                              |                        |                  |                     | OR         | Lower 95% CI | Upper 95% CI | OR       | Lower 95% CI | Upper 95% CI |
| 16-19                        | 14-30                  | 1                | 11                  | 0.42       | 0.05         | 3.24         | 0.45     | 0.06         | 3.61         |
|                              | 31-60                  | 1                | 30                  | 0.15       | 0.02         | 1.12         | 0.18     | 0.02         | 1.38         |
|                              | 61-90                  | 8                | 64                  | 0.57       | 0.27         | 1.20         | 0.58     | 0.27         | 1.24         |
|                              | 91-120                 | 8                | 39                  | 0.94       | 0.44         | 2.02         | 0.79     | 0.36         | 1.73         |
|                              | 121-150                | 1                | 7                   | 0.66       | 0.08         | 5.34         | 0.40     | 0.05         | 3.38         |
| 20-44                        | 14-30                  | 29               | 164                 | 0.80       | 0.54         | 1.18         | 0.93     | 0.62         | 1.40         |
|                              | 31-60                  | 47               | 429                 | 0.49       | 0.37         | 0.67         | 0.54     | 0.40         | 0.74         |
|                              | 61-90                  | 91               | 1112                | 0.37       | 0.30         | 0.46         | 0.41     | 0.33         | 0.51         |
|                              | 91-120                 | 153              | 996                 | 0.69       | 0.58         | 0.82         | 0.57     | 0.48         | 0.68         |
|                              | 121-150                | 23               | 152                 | 0.68       | 0.44         | 1.06         | 0.48     | 0.31         | 0.75         |
| 45-54                        | 14-30                  | 5                | 40                  | 0.50       | 0.20         | 1.27         | 0.43     | 0.17         | 1.11         |
|                              | 31-60                  | 15               | 119                 | 0.50       | 0.29         | 0.87         | 0.53     | 0.30         | 0.92         |
|                              | 61-90                  | 31               | 292                 | 0.42       | 0.29         | 0.62         | 0.45     | 0.30         | 0.66         |
|                              | 91-120                 | 61               | 354                 | 0.69       | 0.52         | 0.91         | 0.62     | 0.46         | 0.82         |
|                              | 121-150                | 13               | 52                  | 1.00       | 0.54         | 1.84         | 0.74     | 0.39         | 1.39         |
| 55-64                        | 14-30                  | 6                | 37                  | 0.60       | 0.25         | 1.43         | 0.52     | 0.21         | 1.28         |
|                              | 31-60                  | 9                | 85                  | 0.39       | 0.20         | 0.78         | 0.46     | 0.23         | 0.93         |
|                              | 61-90                  | 24               | 227                 | 0.39       | 0.26         | 0.60         | 0.40     | 0.26         | 0.63         |
|                              | 91-120                 | 55               | 283                 | 0.72       | 0.53         | 0.97         | 0.63     | 0.46         | 0.87         |
|                              | 121-150                | 14               | 64                  | 0.81       | 0.45         | 1.45         | 0.60     | 0.32         | 1.11         |
| ≥65                          | 14-30                  | 0                | 8                   | 0          | 0            | NA           | 0        | 0            | NA           |
|                              | 31-60                  | 4                | 27                  | 0.52       | 0.18         | 1.49         | 0.61     | 0.20         | 1.86         |
|                              | 61-90                  | 11               | 67                  | 0.58       | 0.30         | 1.10         | 0.67     | 0.34         | 1.33         |
|                              | 91-120                 | 12               | 79                  | 0.53       | 0.29         | 0.99         | 0.47     | 0.25         | 0.91         |
|                              | 121-150                | 2                | 27                  | 0.26       | 0.06         | 1.10         | 0.22     | 0.05         | 1.01         |
| ≥20 (adjusted for age group) | 14-30                  | 40               | 249                 | 0.70       | 0.50         | 0.97         | 0.71     | 0.50         | 1.00         |
|                              | 31-60                  | 75               | 660                 | 0.49       | 0.39         | 0.63         | 0.53     | 0.42         | 0.68         |
|                              | 61-90                  | 157              | 1698                | 0.40       | 0.34         | 0.47         | 0.43     | 0.36         | 0.51         |
|                              | 91-120                 | 281              | 1712                | 0.71       | 0.63         | 0.81         | 0.58     | 0.51         | 0.66         |
|                              | 121-150                | 52               | 295                 | 0.77       | 0.57         | 1.03         | 0.52     | 0.39         | 0.71         |

OR=odds ratio; CI=Confidence interval; NA=Not applicable

<sup>a</sup> Adjusted for race, ethnicity, sex, testing site state, testing site census tract SVI, and calendar date as a continuous variable. For models for ages ≥20 years, ORs also adjusted for age group. Tests with missing SVI excluded from adjusted analyses.

<sup>b</sup> OR for prior COVID-19 vaccination and SARS-CoV-2 test positivity.

**eTable 10. Unadjusted and adjusted <sup>a</sup> Ad26.COVS odds ratios (OR) <sup>b</sup> with 95% confidence intervals (CI) by time since dose and age group, during the Delta period (July 18-October 17, 2021)**

| Age group in years | Time since dose (days) | Cases (Positive) | Controls (Negative) | Unadjusted |              |              | Adjusted |              |              |
|--------------------|------------------------|------------------|---------------------|------------|--------------|--------------|----------|--------------|--------------|
|                    |                        |                  |                     | OR         | Lower 95% CI | Upper 95% CI | OR       | Lower 95% CI | Upper 95% CI |
| 16-19              | 14-30                  | 11               | 48                  | 0.42       | 0.22         | 0.82         | 0.42     | 0.21         | 0.81         |
|                    | 31-60                  | 28               | 109                 | 0.48       | 0.31         | 0.72         | 0.48     | 0.31         | 0.73         |
|                    | 61-90                  | 32               | 163                 | 0.36       | 0.25         | 0.53         | 0.37     | 0.25         | 0.54         |
|                    | 91-120                 | 63               | 268                 | 0.44       | 0.33         | 0.57         | 0.42     | 0.32         | 0.55         |
|                    | 121-150                | 77               | 367                 | 0.39       | 0.30         | 0.50         | 0.39     | 0.31         | 0.51         |
|                    | 151-180                | 62               | 302                 | 0.38       | 0.29         | 0.50         | 0.45     | 0.34         | 0.59         |
|                    | 181-210                | 18               | 119                 | 0.28       | 0.17         | 0.46         | 0.37     | 0.22         | 0.61         |
|                    | 211-240                | 1                | 4                   | 0.46       | 0.05         | 4.15         | 0.63     | 0.07         | 5.71         |
| 20-44              | 14-30                  | 244              | 716                 | 0.62       | 0.54         | 0.72         | 0.61     | 0.53         | 0.71         |
|                    | 31-60                  | 519              | 1583                | 0.60       | 0.54         | 0.66         | 0.58     | 0.53         | 0.64         |
|                    | 61-90                  | 776              | 2568                | 0.55       | 0.51         | 0.60         | 0.54     | 0.50         | 0.59         |
|                    | 91-120                 | 1384             | 5344                | 0.47       | 0.44         | 0.50         | 0.47     | 0.44         | 0.50         |
|                    | 121-150                | 2250             | 9181                | 0.45       | 0.43         | 0.47         | 0.46     | 0.44         | 0.48         |
|                    | 151-180                | 1816             | 7902                | 0.42       | 0.40         | 0.44         | 0.46     | 0.44         | 0.49         |
|                    | 181-210                | 778              | 3785                | 0.37       | 0.35         | 0.40         | 0.46     | 0.42         | 0.50         |
|                    | 211-240                | 100              | 432                 | 0.42       | 0.34         | 0.52         | 0.55     | 0.44         | 0.69         |
| 45-54              | 14-30                  | 96               | 213                 | 0.69       | 0.55         | 0.88         | 0.68     | 0.53         | 0.87         |
|                    | 31-60                  | 174              | 420                 | 0.64       | 0.53         | 0.76         | 0.62     | 0.52         | 0.74         |
|                    | 61-90                  | 297              | 652                 | 0.70       | 0.61         | 0.81         | 0.69     | 0.60         | 0.80         |
|                    | 91-120                 | 524              | 1404                | 0.58       | 0.52         | 0.64         | 0.59     | 0.53         | 0.65         |
|                    | 121-150                | 876              | 2770                | 0.49       | 0.45         | 0.53         | 0.49     | 0.46         | 0.53         |
|                    | 151-180                | 681              | 2433                | 0.43       | 0.40         | 0.47         | 0.45     | 0.42         | 0.50         |
|                    | 181-210                | 354              | 1320                | 0.41       | 0.37         | 0.47         | 0.45     | 0.40         | 0.51         |
|                    | 211-240                | 49               | 165                 | 0.46       | 0.33         | 0.63         | 0.51     | 0.37         | 0.70         |
| 55-64              | 14-30                  | 61               | 117                 | 0.75       | 0.55         | 1.03         | 0.74     | 0.54         | 1.01         |
|                    | 31-60                  | 128              | 269                 | 0.69       | 0.56         | 0.85         | 0.67     | 0.54         | 0.83         |
|                    | 61-90                  | 176              | 473                 | 0.54       | 0.45         | 0.64         | 0.53     | 0.44         | 0.63         |
|                    | 91-120                 | 350              | 1064                | 0.48       | 0.42         | 0.54         | 0.49     | 0.43         | 0.56         |
|                    | 121-150                | 723              | 2301                | 0.45       | 0.42         | 0.49         | 0.47     | 0.43         | 0.51         |
|                    | 151-180                | 684              | 2281                | 0.43       | 0.40         | 0.47         | 0.45     | 0.41         | 0.49         |
|                    | 181-210                | 361              | 1341                | 0.39       | 0.35         | 0.44         | 0.40     | 0.35         | 0.45         |
|                    | 211-240                | 51               | 197                 | 0.37       | 0.27         | 0.51         | 0.37     | 0.27         | 0.51         |
| ≥65                | 14-30                  | 24               | 34                  | 1.00       | 0.59         | 1.69         | 0.96     | 0.57         | 1.64         |
|                    | 31-60                  | 30               | 76                  | 0.56       | 0.37         | 0.86         | 0.53     | 0.35         | 0.82         |
|                    | 61-90                  | 57               | 148                 | 0.55       | 0.40         | 0.74         | 0.57     | 0.42         | 0.78         |
|                    | 91-120                 | 99               | 282                 | 0.50       | 0.39         | 0.63         | 0.56     | 0.44         | 0.70         |
|                    | 121-150                | 196              | 665                 | 0.42       | 0.36         | 0.49         | 0.44     | 0.38         | 0.53         |
|                    | 151-180                | 285              | 814                 | 0.50       | 0.43         | 0.57         | 0.53     | 0.46         | 0.61         |
|                    | 181-210                | 163              | 470                 | 0.49       | 0.41         | 0.59         | 0.47     | 0.39         | 0.57         |
|                    | 211-240                | 24               | 94                  | 0.36       | 0.23         | 0.57         | 0.34     | 0.21         | 0.54         |



| Age group in years           | Time since dose (days) | Cases (Positive) | Controls (Negative) | Adjusted |              |              | Unadjusted |              |              |
|------------------------------|------------------------|------------------|---------------------|----------|--------------|--------------|------------|--------------|--------------|
|                              |                        |                  |                     | OR       | Lower 95% CI | Upper 95% CI | OR         | Lower 95% CI | Upper 95% CI |
| ≥20 (adjusted for age group) | 14-30                  | 425              | 1080                | 0.68     | 0.61         | 0.77         | 0.65       | 0.58         | 0.73         |
|                              | 31-60                  | 851              | 2348                | 0.63     | 0.58         | 0.68         | 0.60       | 0.55         | 0.65         |
|                              | 61-90                  | 1306             | 3841                | 0.59     | 0.56         | 0.63         | 0.57       | 0.53         | 0.60         |
|                              | 91-120                 | 2357             | 8094                | 0.51     | 0.48         | 0.53         | 0.49       | 0.47         | 0.52         |
|                              | 121-150                | 4045             | 14917               | 0.47     | 0.46         | 0.49         | 0.46       | 0.45         | 0.48         |
|                              | 151-180                | 3466             | 13430               | 0.45     | 0.43         | 0.47         | 0.46       | 0.45         | 0.48         |
|                              | 181-210                | 1656             | 6916                | 0.42     | 0.39         | 0.44         | 0.46       | 0.44         | 0.49         |
|                              | 211-240                | 224              | 888                 | 0.44     | 0.38         | 0.51         | 0.50       | 0.43         | 0.58         |

OR=odds ratio; CI=Confidence interval

<sup>a</sup> Adjusted for race, ethnicity, sex, testing site state, testing site census tract SVI, and calendar date as a continuous variable. For models for ages ≥20 years, ORs also adjusted for age group. Tests with missing SVI excluded from adjusted analyses.

<sup>b</sup> OR for prior COVID-19 vaccination and SARS-CoV-2 test positivity.

**eTable 11. Comparison of characteristics of symptomatic persons ages ≥20 years tested for SARS-CoV-2 in *Increasing Community Access to Testing (ICATT) 2.0* with laboratory-based nucleic acid amplification test (NAAT) with known and unknown vaccination status—United States, March 13–October 17, 2021**

| Characteristic                                                        | Known vaccination status |       | Unknown vaccination status |       |
|-----------------------------------------------------------------------|--------------------------|-------|----------------------------|-------|
|                                                                       | n                        | %     | n                          | %     |
| <b>Total</b>                                                          | 1,756,332                |       | 144,817                    |       |
| <b>SARS-CoV-2 test result</b>                                         |                          |       |                            |       |
| Negative                                                              | 1,382,215                | 78.7% | 113,649                    | 78.5% |
| Positive                                                              | 374,117                  | 21.3% | 31,168                     | 21.5% |
| <b>Age group in years</b>                                             |                          |       |                            |       |
| 20-44                                                                 | 1,167,367                | 66.5% | 104,348                    | 72.1% |
| 45-54                                                                 | 260,223                  | 14.8% | 20,222                     | 14.0% |
| 55-64                                                                 | 204,047                  | 11.6% | 13,321                     | 9.2%  |
| 65-74                                                                 | 96,620                   | 5.5%  | 5,187                      | 3.6%  |
| 75-84                                                                 | 23,963                   | 1.4%  | 1,411                      | 1.0%  |
| ≥85                                                                   | 4,112                    | 0.2%  | 328                        | 0.2%  |
| <b>Race<sup>a</sup></b>                                               |                          |       |                            |       |
| American Indian or Alaska Native                                      | 16,237                   | 0.9%  | 1,339                      | 0.9%  |
| Asian                                                                 | 106,964                  | 6.1%  | 9,364                      | 6.5%  |
| Black or African American                                             | 195,765                  | 11.1% | 13,651                     | 9.4%  |
| Native Hawaiian or Other Pacific Islander                             | 11,537                   | 0.7%  | 1,154                      | 0.8%  |
| White                                                                 | 1,174,430                | 66.9% | 83,608                     | 57.7% |
| Other                                                                 | 121,942                  | 6.9%  | 14,755                     | 10.2% |
| Not Reported                                                          | 129,457                  | 7.4%  | 20,946                     | 14.5% |
| <b>Ethnicity<sup>a</sup></b>                                          |                          |       |                            |       |
| Hispanic/Latino                                                       | 312,052                  | 17.8% | 26,180                     | 18.1% |
| Not Hispanic/Latino                                                   | 1,292,573                | 73.6% | 87,305                     | 60.3% |
| Not Reported                                                          | 151,707                  | 8.6%  | 31,332                     | 21.6% |
| <b>Site census tract social vulnerability index (SVI)<sup>b</sup></b> |                          |       |                            |       |
| SVI <0.5 (less socially vulnerable)                                   | 787,893                  | 44.9% | 65,303                     | 45.1% |
| SVI 0.5-1.0 (more socially vulnerable)                                | 963,522                  | 54.9% | 78,754                     | 54.4% |
| Missing SVI                                                           | 4,917                    | 0.3%  | 760                        | 0.5%  |

<sup>a</sup> Race and ethnicity were self-reported from fixed categories provided at test registration. Other race was an available option at test registration at 2 of 3 pharmacy chains.

<sup>b</sup> Testing site census tract SVI was an available variable in ICATT data. SVI is assigned for all US census tracts by CDC/ATSDR (Agency for Toxic Substances and Disease Registry) based on US Census data. Higher SVI indicates greater social vulnerability.

**eTable 12. Comparison of characteristics of symptomatic persons ages 12-19 years tested for SARS-CoV-2 in Increasing Community Access to Testing (2.0) with laboratory-based nucleic acid amplification test (NAAT) with known and unknown vaccination Status--United States, April 15-October 17, 2021 for ages 16-19 years and June 15-October 17, 2021 for ages 12-15 years**

| Characteristic                                                        | Known vaccination status |       | Unknown vaccination status |       |
|-----------------------------------------------------------------------|--------------------------|-------|----------------------------|-------|
|                                                                       | n                        | %     | n                          | %     |
| <b>Total</b>                                                          | 197,105                  |       | 30,183                     |       |
| <b>SARS-CoV-2 test result</b>                                         |                          |       |                            |       |
| Negative                                                              | 155,387                  | 78.8% | 24,476                     | 81.1% |
| Positive                                                              | 41,718                   | 21.2% | 5,707                      | 18.9% |
| <b>Age group in years</b>                                             |                          |       |                            |       |
| 12-15 <sup>a</sup>                                                    | 80,188                   | 40.7% | 19,267                     | 63.8% |
| 16-19 <sup>b</sup>                                                    | 116,917                  | 59.3% | 10,916                     | 36.2% |
| <b>Race<sup>c</sup></b>                                               |                          |       |                            |       |
| American Indian or Alaska Native                                      | 2,504                    | 1.3%  | 354                        | 1.2%  |
| Asian                                                                 | 11,418                   | 5.8%  | 1,437                      | 4.8%  |
| Black or African American                                             | 27,758                   | 14.1% | 3,376                      | 11.2% |
| Native Hawaiian or Other Pacific Islander                             | 1,665                    | 0.8%  | 214                        | 0.7%  |
| White                                                                 | 121,281                  | 61.5% | 17,395                     | 57.6% |
| Other                                                                 | 17,157                   | 8.7%  | 3,818                      | 12.6% |
| Not Reported                                                          | 15,322                   | 7.8%  | 3,589                      | 11.9% |
| <b>Ethnicity<sup>c</sup></b>                                          |                          |       |                            |       |
| Hispanic/Latino                                                       | 50,308                   | 25.5% | 6,804                      | 22.5% |
| Not Hispanic/Latino                                                   | 130,434                  | 66.2% | 18,931                     | 62.7% |
| Not Reported                                                          | 16,363                   | 8.3%  | 4,448                      | 14.7% |
| <b>Site census tract social vulnerability index (SVI)<sup>d</sup></b> |                          |       |                            |       |
| SVI <0.5 (less socially vulnerable)                                   | 85,813                   | 43.5% | 13,339                     | 44.2% |
| SVI 0.5-1.0 (more socially vulnerable)                                | 110,846                  | 56.2% | 16,783                     | 55.6% |
| Missing SVI                                                           | 446                      | 0.2%  | 61                         | 0.2%  |

<sup>a</sup> Data from adolescents ages 12-15 years were included if their test dates occurred from June 15, 2021 (5 weeks after BNT162b2 Emergency Use Authorization [EUA] for this age group) to October 17, 2021.

<sup>b</sup> Data for adolescents 16-19 years were included from April 15, 2021 (prior to that date ages 0-19 years were reported in aggregate to ICATT) to October 17, 2021.

<sup>c</sup> Race and ethnicity were self-reported from fixed categories provided at test registration. Other race was an available option at test registration at 2 of 3 pharmacy chains.

<sup>d</sup> Testing site census tract SVI was an available variable in ICATT data. SVI is assigned for all US census tracts by CDC/ATSDR (Agency for Toxic Substances and Disease Registry) based on US Census data. Higher SVI indicates greater social vulnerability.

**eTable 13. Odds ratios (OR) <sup>a</sup> with 95% confidence intervals (CI) for day 14, mean of daily OR estimates from days 14-60 (initial OR), and end day for Figures 2, 3, and 4.**

| Vaccine product                                                                                                                                           | Age group (years) | Pre-Delta period <sup>b</sup> day 14 <sup>c</sup> OR (95% CI) | Pre-Delta period initial OR <sup>d</sup> (95% CI) | Pre-Delta period end day <sup>e</sup> | Pre-Delta period end day OR (95% CI) | Delta <sup>f</sup> period day 14 OR (95% CI) | Delta period initial OR (95% CI) | Delta period end day | Delta period end day OR (95% CI) |
|-----------------------------------------------------------------------------------------------------------------------------------------------------------|-------------------|---------------------------------------------------------------|---------------------------------------------------|---------------------------------------|--------------------------------------|----------------------------------------------|----------------------------------|----------------------|----------------------------------|
| <b>Figure 2: Association of COVID-19 Vaccination and Symptomatic SARS-CoV-2 Infection by Day Since Vaccination Among Adults 20 Years and Older</b>        |                   |                                                               |                                                   |                                       |                                      |                                              |                                  |                      |                                  |
| <b>BNT162b2</b>                                                                                                                                           | ≥20               | 0.04<br>(0.02, 0.07)                                          | 0.10<br>(0.09, 0.11)                              | 111                                   | 0.16<br>(0.12, 0.22)                 | 0.12<br>(0.11, 0.13)                         | 0.16<br>(0.16, 0.17)             | 280                  | 0.37<br>(0.33, 0.40)             |
| <b>mRNA-1273</b>                                                                                                                                          | ≥20               | 0.03<br>(0.02, 0.07)                                          | 0.05<br>(0.04, 0.05)                              | 93                                    | 0.08<br>(0.06, 0.12)                 | 0.08<br>(0.07, 0.09)                         | 0.10<br>(0.10, 0.11)             | 266                  | 0.35<br>(0.31, 0.39)             |
| <b>Ad26.COVS.S</b>                                                                                                                                        | ≥20               | 0.67<br>(0.48, 0.95)                                          | 0.42<br>(0.37, 0.47)                              | 66                                    | 0.32<br>(0.23, 0.45)                 | 0.66<br>(0.59, 0.73)                         | 0.62<br>(0.58, 0.65)             | 224                  | 0.48<br>(0.41, 0.56)             |
| <b>Figure 3: Association of COVID-19 Vaccination and Symptomatic SARS-CoV-2 Infection by Day Since Vaccination by Adult Age Group and Vaccine Product</b> |                   |                                                               |                                                   |                                       |                                      |                                              |                                  |                      |                                  |
| <b>BNT162b2</b>                                                                                                                                           | 20-44             | 0.02<br>(0.01, 0.06)                                          | 0.10<br>(0.08, 0.12)                              | 107                                   | 0.19<br>(0.13, 0.28)                 | 0.11<br>(0.10, 0.12)                         | 0.16<br>(0.15, 0.16)             | 279                  | 0.39<br>(0.35, 0.44)             |
| <b>BNT162b2</b>                                                                                                                                           | 45-54             | 0.06<br>(0.02, 0.19)                                          | 0.12<br>(0.08, 0.15)                              | 90                                    | 0.19<br>(0.12, 0.30)                 | 0.13<br>(0.11, 0.15)                         | 0.18<br>(0.16, 0.19)             | 275                  | 0.42<br>(0.34, 0.51)             |
| <b>BNT162b2</b>                                                                                                                                           | 55-64             | 0.06<br>(0.02, 0.17)                                          | 0.08<br>(0.06, 0.10)                              | 87                                    | 0.16<br>(0.10, 0.26)                 | 0.11<br>(0.09, 0.14)                         | 0.16<br>(0.14, 0.18)             | 269                  | 0.34<br>(0.28, 0.42)             |
| <b>BNT162b2</b>                                                                                                                                           | ≥65               | 0.04<br>(0.01, 0.13)                                          | 0.11<br>(0.08, 0.14)                              | 83                                    | 0.14<br>(0.09, 0.22)                 | 0.25<br>(0.19, 0.32)                         | 0.27<br>(0.22, 0.31)             | 260                  | 0.23<br>(0.18, 0.29)             |
| <b>mRNA-1273</b>                                                                                                                                          | 20-44             | 0.01<br>(<0.01, 0.05)                                         | 0.04<br>(0.03, 0.06)                              | 88                                    | 0.10<br>(0.07, 0.16)                 | 0.07<br>(0.06, 0.08)                         | 0.10<br>(0.09, 0.11)             | 265                  | 0.40<br>(0.35, 0.46)             |
| <b>mRNA-1273</b>                                                                                                                                          | 45-54             | 0.03<br>(<0.01, 0.16)                                         | 0.05<br>(0.03, 0.08)                              | 68                                    | 0.11<br>(0.06, 0.19)                 | 0.07<br>(0.05, 0.10)                         | 0.10<br>(0.09, 0.12)             | 257                  | 0.30<br>(0.24, 0.37)             |
| <b>mRNA-1273</b>                                                                                                                                          | 55-64             | <0.01<br>(<0.01, 0.11)                                        | 0.03<br>(0.01, 0.05)                              | 68                                    | 0.07<br>(0.04, 0.13)                 | 0.09<br>(0.07, 0.13)                         | 0.12<br>(0.09, 0.14)             | 258                  | 0.28<br>(0.22, 0.36)             |
| <b>mRNA-1273</b>                                                                                                                                          | ≥65               | 0.12<br>(0.05, 0.30)                                          | 0.05<br>(0.03, 0.06)                              | 55                                    | 0.04<br>(0.02, 0.07)                 | 0.21<br>(0.14, 0.31)                         | 0.21<br>(0.15, 0.26)             | 254                  | 0.20<br>(0.15, 0.26)             |
| <b>Ad26.COVS.S</b>                                                                                                                                        | 20-44             | 0.90<br>(0.57, 1.41)                                          | 0.42<br>(0.34, 0.49)                              | 60                                    | 0.30<br>(0.19, 0.48)                 | 0.61<br>(0.53, 0.71)                         | 0.58<br>(0.54, 0.63)             | 221                  | 0.48<br>(0.39, 0.59)             |
| <b>Ad26.COVS.S</b>                                                                                                                                        | 45-54             | 0.30<br>(0.12, 0.75)                                          | 0.45<br>(0.33, 0.58)                              | 52                                    | 0.42<br>(0.24, 0.75)                 | 0.68<br>(0.53, 0.87)                         | 0.68<br>(0.59, 0.77)             | 219                  | 0.50<br>(0.38, 0.66)             |

| Vaccine product                                                                                                                                                | Age group (years) | Pre-Delta period <sup>b</sup> day 14 <sup>c</sup> OR (95% CI) | Pre-Delta period initial OR <sup>d</sup> (95% CI) | Pre-Delta period end day <sup>e</sup> | Pre-Delta period end day OR (95% CI) | Delta <sup>f</sup> period day 14 OR (95% CI) | Delta period initial OR (95% CI) | Delta period end day | Delta period end day OR (95% CI) |
|----------------------------------------------------------------------------------------------------------------------------------------------------------------|-------------------|---------------------------------------------------------------|---------------------------------------------------|---------------------------------------|--------------------------------------|----------------------------------------------|----------------------------------|----------------------|----------------------------------|
| Ad26.COVS.S                                                                                                                                                    | 55-64             | 0.52<br>(0.23, 1.18)                                          | 0.30<br>(0.21, 0.39)                              | 49                                    | 0.22<br>(0.12, 0.39)                 | 0.77<br>(0.57, 1.03)                         | 0.67<br>(0.55, 0.78)             | 219                  | 0.36<br>(0.27, 0.47)             |
| Ad26.COVS.S                                                                                                                                                    | ≥65               | 1.33<br>(0.35, 5.10)                                          | 0.64<br>(0.38, 0.90)                              | 43                                    | 0.65<br>(0.33, 1.27)                 | 0.93<br>(0.56, 1.55)                         | 0.74<br>(0.52, 0.97)             | 216                  | 0.39<br>(0.27, 0.55)             |
| <b>Figure 4: Association of COVID-19 Vaccination and Symptomatic SARS-CoV-2 Infection by Day Since Vaccination by Adolescent Age Group and Vaccine Product</b> |                   |                                                               |                                                   |                                       |                                      |                                              |                                  |                      |                                  |
| BNT162b2                                                                                                                                                       | 12-15             | NA <sup>g</sup>                                               | NA <sup>g</sup>                                   | NA <sup>g</sup>                       | NA <sup>g</sup>                      | 0.03<br>(0.02, 0.05)                         | 0.06<br>(0.05, 0.06)             | 127                  | 0.11<br>(0.08, 0.15)             |
| BNT162b2                                                                                                                                                       | 16-19             | NA <sup>g</sup>                                               | NA <sup>g</sup>                                   | NA <sup>g</sup>                       | NA <sup>g</sup>                      | 0.06<br>(0.05, 0.08)                         | 0.10<br>(0.09, 0.11)             | 231                  | 0.38<br>(0.27, 0.53)             |
| mRNA-1273 <sup>h</sup>                                                                                                                                         | 16-19             | NA <sup>g</sup>                                               | NA <sup>g</sup>                                   | NA <sup>g</sup>                       | NA <sup>g</sup>                      | 0.01<br>(<0.01, 0.04)                        | 0.06<br>(0.04, 0.08)             | 203                  | 0.23<br>(0.17, 0.31)             |
| Ad26.COVS.S <sup>h</sup>                                                                                                                                       | 16-19             | NA <sup>g</sup>                                               | NA <sup>g</sup>                                   | NA <sup>g</sup>                       | NA <sup>g</sup>                      | 0.48<br>(0.25, 0.94)                         | 0.46<br>(0.30, 0.62)             | 184                  | 0.43<br>(0.31, 0.58)             |

OR=odds ratio; CI=confidence interval; NA=Not applicable

<sup>a</sup> OR for prior COVID-19 vaccination and SARS-CoV-2 test positivity. ORs adjusted for race, ethnicity, sex, testing site state, testing site census tract SVI, and calendar date as a continuous variable. For models for ages ≥20 years, ORs also adjusted for age group. Tests with missing SVI excluded from adjusted analyses.

<sup>b</sup> Pre-Delta period: March 13-May 29, 2021.

<sup>c</sup> Day 14 after second dose for BNT162b2 and mRNA-1273 or after the dose for Ad26.COVS.S.

<sup>d</sup> Initial OR is the mean of the daily OR estimates on days 14-60 following receipt of the second dose for BNT162b2 and mRNA-1273 or after the dose for Ad26.COVS.S. It summarizes the OR during the initial period after vaccination.

<sup>e</sup> End day defined as the day after which ≤10 cases remained for each product-, age-group- and period-specific model.

<sup>f</sup> Delta period: July 18-October 17, 2021.

<sup>g</sup> For adolescent age groups (12-15 and 16-19 years) in the pre-Delta period, data were too sparse to estimate ORs by day since vaccination.

<sup>h</sup> mRNA-1273 and Ad26.COVS.S were only authorized for persons ages ≥18 years.

**eTable 14. Significance testing for comparisons of mean of daily odds ratios (OR)<sup>a</sup> estimates from days 14-60 after vaccination (initial OR) between vaccine products (BNT162b2, mRNA-1273, and Ad26.COVS) and time periods (pre-Delta vs. Delta) for adults ages ≥20 years**

|                                                                                                          | Vaccine product      |                      |                      | p-value <sup>d</sup> for comparison of initial OR for different vaccine products by pre-Delta or Delta period |
|----------------------------------------------------------------------------------------------------------|----------------------|----------------------|----------------------|---------------------------------------------------------------------------------------------------------------|
|                                                                                                          | BNT162b2             | mRNA-1273            | Ad26.COVS            |                                                                                                               |
| <b>Initial OR<sup>b</sup> (95% CI) for pre-Delta period<sup>c</sup></b>                                  | 0.10<br>(0.09, 0.11) | 0.05<br>(0.04, 0.05) | 0.42<br>(0.37, 0.47) | BNT162b2 vs. mRNA1273: p<0.001<br>BNT162b2 vs. Ad26.COVS: p<0.001<br>mRNA1273 vs. Ad26.COVS: p<0.001          |
| <b>Initial OR (95% CI) for Delta period<sup>e</sup></b>                                                  | 0.16<br>(0.16, 0.17) | 0.10<br>(0.10, 0.11) | 0.62<br>(0.58, 0.65) | BNT162b2 vs. mRNA1273: p<0.001<br>BNT162b2 vs. Ad26.COVS: p<0.001<br>mRNA1273 vs. Ad26.COVS: p<0.001          |
| <b>p-value<sup>d</sup> for comparison of initial OR in pre-Delta vs. Delta period by vaccine product</b> | p<0.001              | p<0.001              | p<0.001              |                                                                                                               |

OR=odds ratio; CI=Confidence interval

<sup>a</sup> OR for prior COVID-19 vaccination and SARS-CoV-2 test positivity. ORs adjusted for age group, race, ethnicity, sex, testing site state, testing site census tract SVI, and calendar date as a continuous variable. Tests with missing SVI excluded from adjusted analyses.

<sup>b</sup> Initial OR is the mean of the daily OR estimates on days 14-60 following receipt of the second dose for BNT162b2 and mRNA-1273 or after the dose for Ad26.COVS. It summarizes the OR during the initial period after vaccination.

<sup>c</sup> Pre-Delta period: March 13-May 29, 2021.

<sup>d</sup> Two-sided p-values comparing the magnitude of the association between vaccination and infection across products and study periods for adults ages ≥20 years were corrected for multiple comparisons using Benjamini-Hochberg false discovery rate (FDR), and results with FDR-adjusted p-value <0.001 were considered significant.

<sup>e</sup> Delta period: July 18-October 17, 2021.

**eTable 15. Characteristics of included adolescent cases and controls ages 12-19 years tested for SARS-CoV-2 in Increasing Community Access To Testing (ICATT) 2.0 -- United States, April 15-October 17, 2021 for ages 16-19 years and June 15-October 17, 2021 for ages 12-15 years**

| Characteristic                                                         | SARS-CoV-2 positive cases |       | SARS-CoV-2 negative controls |       |
|------------------------------------------------------------------------|---------------------------|-------|------------------------------|-------|
|                                                                        | n                         | %     | n                            | %     |
| <b>Total</b>                                                           | 39,422                    |       | 140,690                      |       |
| <b>Age group in years</b>                                              |                           |       |                              |       |
| 12-15 <sup>a</sup>                                                     | 14,988                    | 38.0% | 56,216                       | 40.0% |
| 16-19 <sup>b</sup>                                                     | 24,434                    | 62.0% | 84,474                       | 60.0% |
| <b>Sex <sup>c</sup></b>                                                | n=39,357                  |       | n=140,183                    |       |
| Female                                                                 | 20,696                    | 52.6% | 76,108                       | 54.3% |
| Male                                                                   | 18,644                    | 47.4% | 64,002                       | 45.7% |
| Other                                                                  | 17                        | 0.0%  | 73                           | 0.1%  |
| <b>Race <sup>d</sup></b>                                               | n=36,083                  |       | n=130,151                    |       |
| American Indian/Alaska Native                                          | 531                       | 1.5%  | 1,748                        | 1.3%  |
| Asian                                                                  | 1,137                     | 3.2%  | 9,075                        | 7.0%  |
| Black or African American                                              | 7,035                     | 19.5% | 18,487                       | 14.2% |
| Native Hawaiian or Other Pacific Islander                              | 356                       | 1.0%  | 1,168                        | 0.9%  |
| White                                                                  | 23,957                    | 66.4% | 87,117                       | 66.9% |
| Other                                                                  | 3,067                     | 8.5%  | 12,556                       | 9.6%  |
| <b>Ethnicity <sup>d</sup></b>                                          | n=35,927                  |       | n=129,144                    |       |
| Hispanic/Latino                                                        | 10,007                    | 27.9% | 35,287                       | 27.3% |
| <b>Region <sup>e</sup></b>                                             |                           |       |                              |       |
| New England                                                            | 828                       | 2.1%  | 6,666                        | 4.7%  |
| Mid-Atlantic                                                           | 3,696                     | 9.4%  | 19,713                       | 14.0% |
| South Atlantic                                                         | 8,829                     | 22.4% | 21,943                       | 15.6% |
| East North Central                                                     | 6,197                     | 15.7% | 25,051                       | 17.8% |
| East South Central                                                     | 2,728                     | 6.9%  | 5,363                        | 3.8%  |
| West North Central                                                     | 1,854                     | 4.7%  | 7,833                        | 5.6%  |
| West South Central                                                     | 4,147                     | 10.5% | 9,351                        | 6.6%  |
| Mountain                                                               | 3,046                     | 7.7%  | 12,897                       | 9.2%  |
| Pacific                                                                | 8,054                     | 20.4% | 31,613                       | 22.5% |
| Puerto Rico                                                            | 43                        | 0.1%  | 260                          | 0.2%  |
| <b>Site census tract social vulnerability index (SVI) <sup>f</sup></b> | n=39,363                  |       | n=140,349                    |       |
| SVI <0.5 (less socially vulnerable)                                    | 15,045                    | 38.2% | 63,123                       | 45.0% |
| SVI 0.5-1.0 (more socially vulnerable)                                 | 24,318                    | 61.8% | 77,226                       | 55.0% |
| <b>Vaccination status</b>                                              |                           |       |                              |       |
| Unvaccinated                                                           | 35,369                    | 89.7% | 75,442                       | 53.6% |
| Ad26.COVS fully vaccinated <sup>g, h</sup>                             | 312                       | 0.8%  | 1,562                        | 1.1%  |

| Characteristic                             | SARS-CoV-2 positive cases |       | SARS-CoV-2 negative controls |       |
|--------------------------------------------|---------------------------|-------|------------------------------|-------|
|                                            | n                         | %     | n                            | %     |
| mRNA fully vaccinated <sup>g</sup>         | 3,741                     | 9.5%  | 63,686                       | 45.3% |
| BNT162b2 fully vaccinated <sup>g</sup>     | 3,305                     | 8.4%  | 57,373                       | 40.8% |
| mRNA-1273 fully vaccinated <sup>g, h</sup> | 436                       | 1.1%  | 6,313                        | 4.5%  |
| <b>Period<sup>i</sup></b>                  |                           |       |                              |       |
| Pre-Delta (March 13–May 29, 2021)          | 871                       | 2.2%  | 3,625                        | 2.6%  |
| Intermediate (May 30–July 17, 2021)        | 1,552                     | 3.9%  | 10,442                       | 7.4%  |
| Delta (July 18–October 17, 2021)           | 36,999                    | 93.9% | 126,623                      | 90.0% |

<sup>a</sup> Data from adolescents ages 12-15 years were included if their test dates occurred from June 15, 2021 (5 weeks after BNT162b2 Emergency Use Authorization [EUA] for this age group) to October 17, 2021.

<sup>b</sup> Data for adolescents 16-19 years were included from April 15, 2021 (prior to that date ages 0-19 years were reported in aggregate to ICATT) to October 17, 2021.

<sup>c</sup> Tests with missing sex (n= 572) were combined with other sex to retain those tests in regression models.

<sup>d</sup> Race and ethnicity were self-reported from fixed categories provided at test registration. Other race was an available option at test registration at 2 of 3 pharmacy chains. Unknown race (n= 13,878) and ethnicity (n=15,041) were coded as categorical levels within each variable to retain those tests in regression models.

<sup>e</sup> Regions defined as: New England (Connecticut, Maine, Massachusetts, New Hampshire, Rhode Island, and Vermont), Mid-Atlantic (New Jersey, New York, and Pennsylvania), South Atlantic (Delaware, Florida, Georgia, Maryland, North Carolina, South Carolina, Virginia, District of Columbia, and West Virginia), East North Central (Illinois, Indiana, Michigan, Ohio, and Wisconsin), East South Central (Alabama, Kentucky, Mississippi, and Tennessee), West North Central (Iowa, Kansas, Minnesota, Missouri, Nebraska, North Dakota, and South Dakota), West South Central (Arkansas, Louisiana, Oklahoma, and Texas), Mountain (Arizona, Colorado, Idaho, Montana, Nevada, New Mexico, Utah, and Wyoming), Pacific (Alaska, California, Hawaii, Oregon, and Washington), and Puerto Rico.

<sup>f</sup> Testing site census tract SVI was an available variable in ICATT data. SVI is assigned for all US census tracts by CDC/ATSDR (Agency for Toxic Substances and Disease Registry) based on US Census data. Tests with missing SVI (n=400) were included in unadjusted analyses but not included in adjusted analyses. All data for Puerto Rico were missing SVI, and therefore records from Puerto Rico were dropped from the adjusted analyses.

<sup>g</sup> Fully vaccinated: 2 doses of an mRNA vaccine or 1 dose of the Ad26.COVID.S vaccine  $\geq 14$  days prior to SARS-CoV-2 test date.

<sup>h</sup> mRNA-1273 and Ad26.COVID.S COVID-19 vaccines were only authorized for those ages  $\geq 18$  years during these time periods.

<sup>i</sup> Time periods defined based on the percentage of the Delta variant among US sequenced SARS-COV-2 specimens: pre-Delta (<14%: March 13–May 29, 2021), intermediate (14-90%: May 30–July 17, 2021), and Delta (>90%: July 18–October 17, 2021).



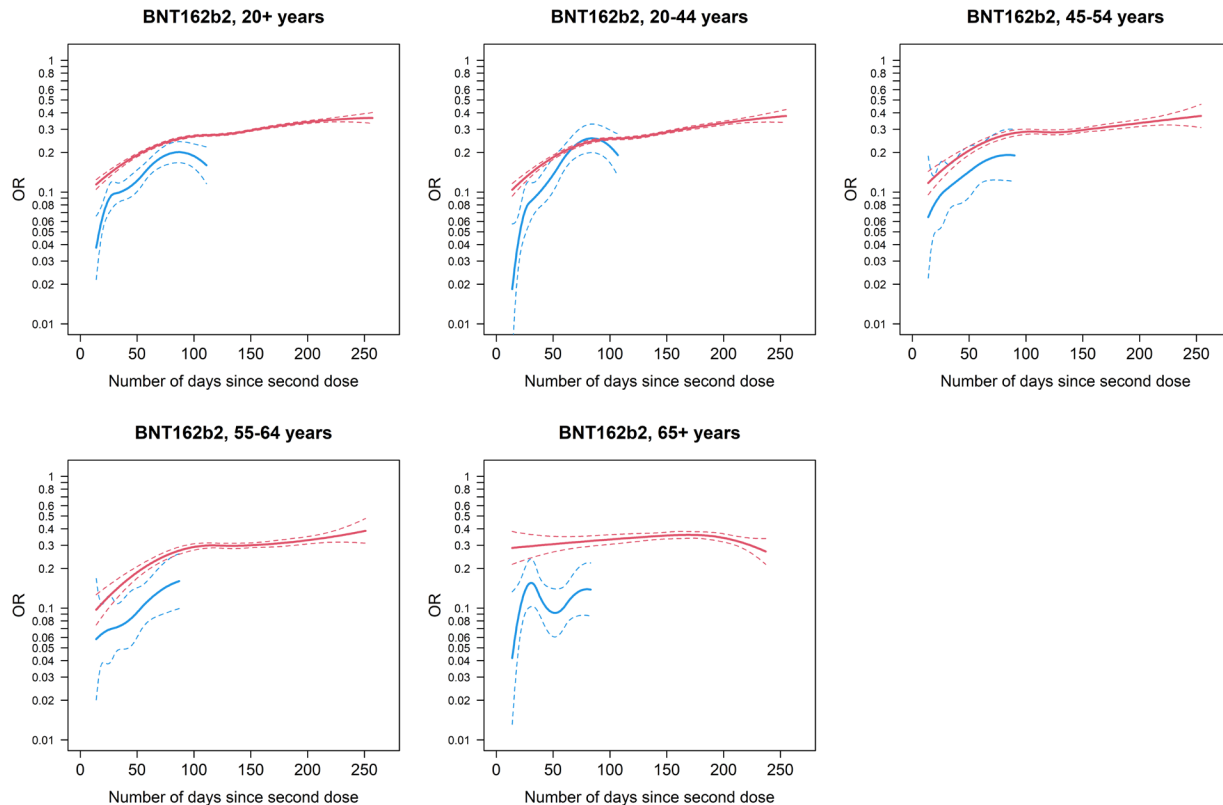

**eFigure 1. Sensitivity analysis restricting to tests performed through September 23, 2021: association of BNT162b2 vaccination and symptomatic infection by day since vaccination by adult age group.** a. Adults ages  $\geq 20$  years adjusted by age group. b. Adults ages 20-44 years. c. Adults ages 45-54 years. d. Adults ages 55-64 years. e. Adults ages  $\geq 65$  years.

This sensitivity analysis was conducted restricting the BNT162b2 model for adults ages  $\geq 20$  years during the Delta period to tests performed through September 23, 2021 (prior to initial booster dose recommendation for BNT162b2). Panels display odds ratios (OR), plotted on a logarithmic scale, for prior COVID-19 vaccination (by vaccine product) and SARS-CoV-2 test positivity by day since vaccination (starting at day 14 since second dose) in pre-Delta (March 13-May 29, 2021; shown in blue) and Delta (July 18-September 23; shown in red) periods with 95% confidence intervals (CI). OR adjusted for race, ethnicity, sex, testing site state, testing site census tract social vulnerability index (SVI), and calendar date as a continuous variable. For models for ages  $\geq 20$  years, ORs also adjusted for age group. Tests with missing SVI excluded from adjusted analyses. For this figure, the presented (fitted) curves were truncated on the day after which  $\leq 10$  cases remained for each product-and age-group-specific model, beyond which CIs widened.

Odds ratios (OR) <sup>a</sup> (95% CI) for day 14 and end day for eFigure 1.

| Vaccine product | Age group (years) | Pre-Delta <sup>b</sup> period day 14 <sup>c</sup> OR (95% CI) | Pre-Delta period end day <sup>d</sup> | Pre-Delta period end day OR (95% CI) | Delta <sup>e</sup> period day 14 OR (95% CI) | Delta period end day | Delta period end day OR (95% CI) |
|-----------------|-------------------|---------------------------------------------------------------|---------------------------------------|--------------------------------------|----------------------------------------------|----------------------|----------------------------------|
| BNT162b2        | ≥20               | 0.04<br>(0.02, 0.07)                                          | 111                                   | 0.16<br>(0.12, 0.22)                 | 0.11<br>(0.11, 0.12)                         | 257                  | 0.37<br>(0.33, 0.40)             |
| BNT162b2        | 20-44             | 0.02<br>(0.01, 0.06)                                          | 107                                   | 0.19<br>(0.13, 0.28)                 | 0.10<br>(0.09, 0.12)                         | 255                  | 0.38<br>(0.34, 0.42)             |
| BNT162b2        | 45-54             | 0.06<br>(0.02, 0.19)                                          | 90                                    | 0.19<br>(0.12, 0.30)                 | 0.12<br>(0.10, 0.14)                         | 254                  | 0.38<br>(0.31, 0.46)             |
| BNT162b2        | 55-64             | 0.06<br>(0.02, 0.17)                                          | 87                                    | 0.16<br>(0.10, 0.26)                 | 0.10<br>(0.07, 0.13)                         | 251                  | 0.39<br>(0.31, 0.48)             |
| BNT162b2        | ≥65               | 0.04<br>(0.01, 0.13)                                          | 83                                    | 0.14<br>(0.09, 0.22)                 | 0.29<br>(0.21, 0.38)                         | 237                  | 0.27<br>(0.21, 0.34)             |

OR=odds ratio; CI=confidence interval; NA=Not applicable

<sup>a</sup> OR for prior COVID-19 vaccination and SARS-CoV-2 test positivity. ORs adjusted for race, ethnicity, sex, testing site state, testing site census tract SVI, and calendar date as a continuous variable. For models for ages ≥20 years, ORs also adjusted for age group. Tests with missing SVI excluded from adjusted analyses.

<sup>b</sup> Pre-Delta period: March 13-May 29, 2021.

<sup>c</sup> Day 14 after second dose for BNT162b2.

<sup>d</sup> End day defined as the day after which ≤10 cases remained for each age-group- and period-specific model.

<sup>e</sup> Delta period (restricted): July 18-September 23, 2021.

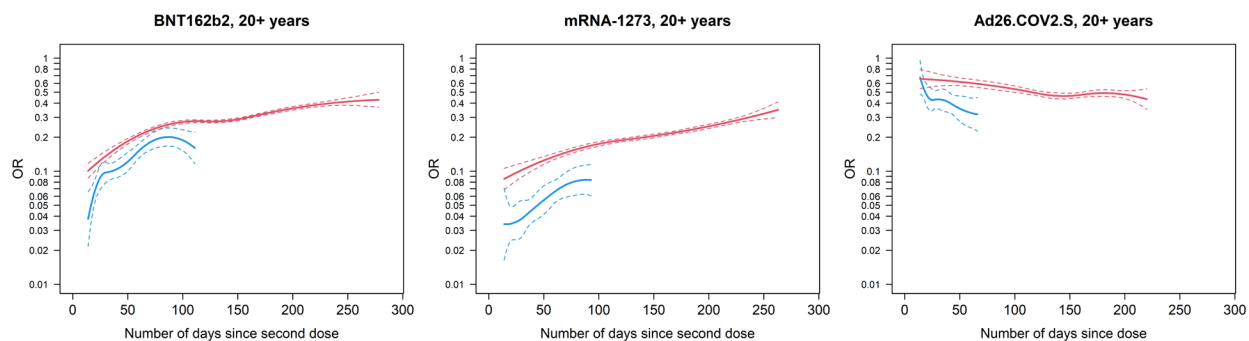

**eFigure 2. Sensitivity analysis excluding pharmacy chain C: association of COVID-19 vaccination and symptomatic infection by day since vaccination among adults ages  $\geq 20$  years.**

a. BNT162b2 vaccine. b. mRNA-1273 vaccine. c. Ad26.COVS.2 vaccine.

Panels display odds ratios (OR), plotted on a logarithmic scale, for prior COVID-19 vaccination (by vaccine product) and SARS-CoV-2 test positivity by day since vaccination (starting at day 14 since second mRNA dose or Ad26.COVS.2 dose) in pre-Delta (March 13-May 29, 2021; shown in blue) and Delta (July 18-October 17; shown in red) periods with 95% confidence intervals (CI). OR adjusted for age group, race, ethnicity, sex, testing site state, testing site census tract social vulnerability index (SVI), and calendar date as a continuous variable. Tests with missing SVI excluded from adjusted analyses. For this figure, the presented (fitted) curves were truncated on the day after which  $\leq 10$  cases remained, beyond which CIs widened.

**Odds ratios (ORs) <sup>a</sup> (95% CI) for day 14 and end day for eFigure 2.**

| Vaccine product | Age group (years) | Pre-Delta <sup>b</sup> period day 14 <sup>c</sup> OR (95% CI) | Pre-Delta period end day <sup>d</sup> | Pre-Delta period end day OR (95% CI) | Delta <sup>e</sup> period day 14 OR (95% CI) | Delta period end day | Delta period end day OR (95% CI) |
|-----------------|-------------------|---------------------------------------------------------------|---------------------------------------|--------------------------------------|----------------------------------------------|----------------------|----------------------------------|
| BNT162b2        | $\geq 20$         | 0.04<br>(0.02, 0.07)                                          | 111                                   | 0.16<br>(0.12, 0.22)                 | 0.10<br>(0.09, 0.12)                         | 278                  | 0.43<br>(0.37, 0.50)             |
| mRNA-1273       | $\geq 20$         | 0.03<br>(0.02, 0.07)                                          | 93                                    | 0.08<br>(0.06, 0.12)                 | 0.09<br>(0.07, 0.11)                         | 263                  | 0.35<br>(0.30, 0.41)             |
| Ad26.COVS.2     | $\geq 20$         | 0.67<br>(0.48, 0.95)                                          | 66                                    | 0.32<br>(0.23, 0.45)                 | 0.66<br>(0.54, 0.80)                         | 220                  | 0.43<br>(0.35, 0.53)             |

OR=odds ratio; CI=confidence interval; NA=Not applicable

<sup>a</sup> OR for prior COVID-19 vaccination and SARS-CoV-2 test positivity. ORs adjusted for age group race, ethnicity, sex, testing site state, testing site census tract SVI, and calendar date as a continuous variable. Tests with missing SVI excluded from adjusted analyses.

<sup>b</sup> Pre-Delta period: March 13-May 29, 2021.

<sup>c</sup> Day 14 after second dose for BNT162b2 and mRNA-1273 or after the dose for Ad26.COVS.2.

<sup>d</sup> End day defined as the day after which  $\leq 10$  cases remained for each product- and period-specific model.

<sup>e</sup> Delta period: July 18-October 17, 2021.

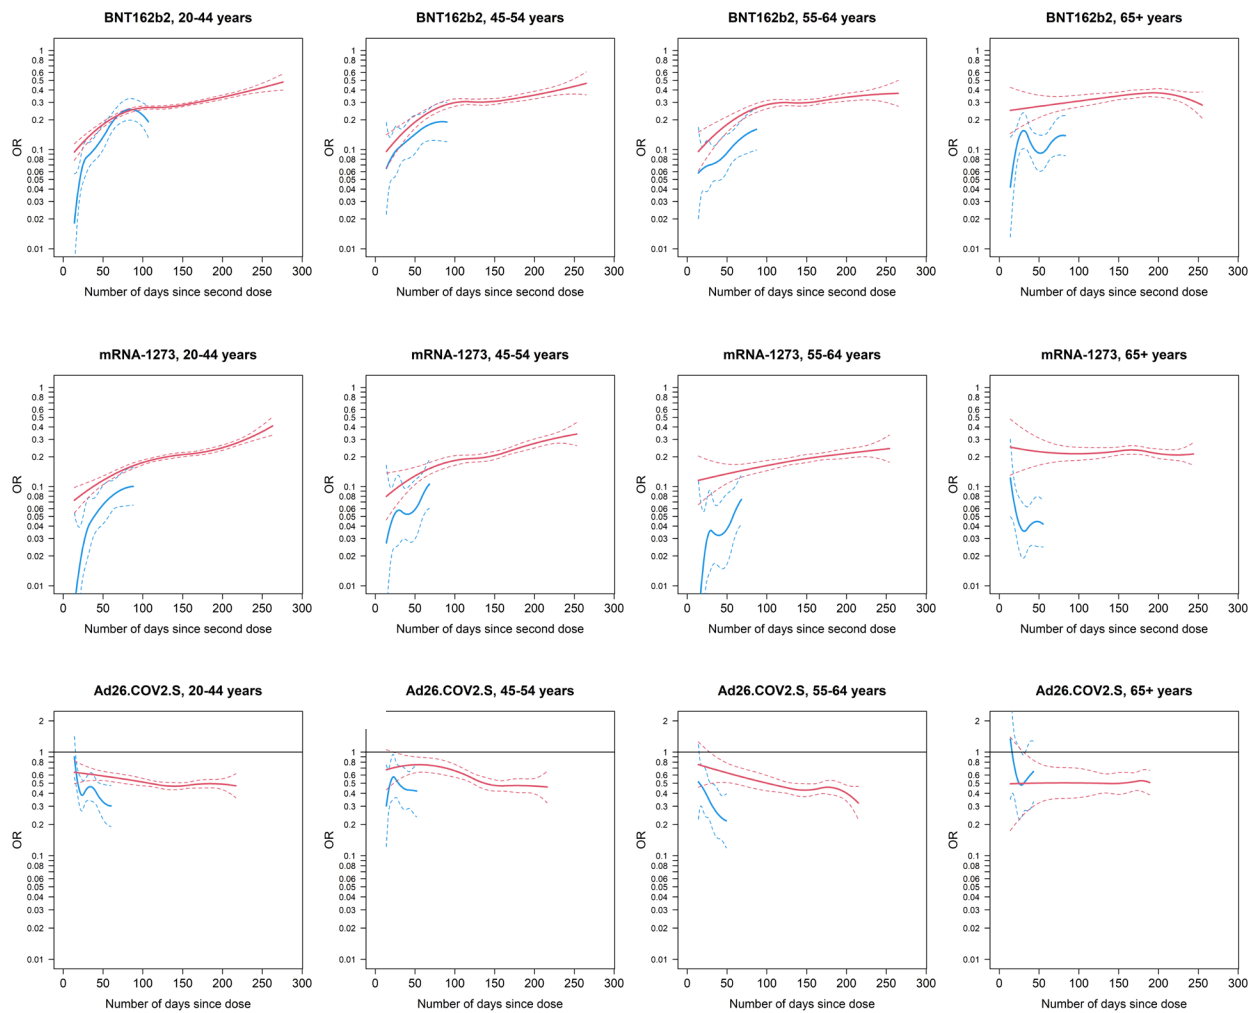

**Figure 3. Sensitivity analysis excluding pharmacy chain C: association of COVID-19 vaccination and symptomatic infection by day since vaccination by adult age group and vaccine product.**

a. BNT162b2 vaccine for adults ages 20-44 years. b. BNT162b2 vaccine for adults ages 45-54 years. c. BNT162b2 vaccine for adults ages 55-64 years. d. BNT162b2 vaccine for adults ages  $\geq 65$  years. e. mRNA-1273 vaccine for adults ages 20-44 years. f. mRNA-1273 vaccine for adults ages 45-54 years. g. mRNA-1273 vaccine for adults ages 55-64 years. h. mRNA-1273 vaccine for adults ages  $\geq 65$  years. i. Ad26.COVS vaccine for adults ages 20-44 years. j. Ad26.COVS vaccine for adults ages 45-54 years. k. Ad26.COVS vaccine for adults ages 55-64 years. l. Ad26.COVS vaccine for adults ages  $\geq 65$  years.

Panels display odds ratios (OR), plotted on a logarithmic scale, for prior COVID-19 vaccination (by vaccine product) and SARS-CoV-2 test positivity by day since vaccination (starting at day 14 since second mRNA dose or Ad26.COVS dose) in pre-Delta (March 13-May 29, 2021; shown in blue) and Delta (July 18-October 17; shown in red) periods with 95% confidence intervals (CI). OR adjusted for race, ethnicity, sex, testing site state, testing site census tract social vulnerability index (SVI), and calendar date as a continuous variable. Tests with missing SVI excluded from adjusted analyses. For this figure, the presented (fitted) curves were truncated on the day after which  $\leq 10$  cases remained for each product-

age-group-, and period-specific model, beyond which CIs widened. For Ad26.COVS.S, the y-axis truncated at 2.0, and data points above 2.0 are not shown.

**Odds ratios (ORs) <sup>a</sup> (95% CI) for day 14 and end day for eFigure 3.**

| Vaccine product | Age group (years) | Pre-Delta <sup>b</sup> period day 14 <sup>c</sup> OR (95% CI) | Pre-Delta period end day <sup>d</sup> | Pre-Delta period end day OR (95% CI) | Delta <sup>e</sup> period day 14 OR (95% CI) | Delta period end day | Delta period end day OR (95% CI) |
|-----------------|-------------------|---------------------------------------------------------------|---------------------------------------|--------------------------------------|----------------------------------------------|----------------------|----------------------------------|
| BNT162b2        | 20-44             | 0.02<br>(0.01, 0.06)                                          | 107                                   | 0.19<br>(0.13, 0.28)                 | 0.09<br>(0.08, 0.11)                         | 276                  | 0.48<br>(0.40, 0.58)             |
| BNT162b2        | 45-54             | 0.06<br>(0.02, 0.19)                                          | 90                                    | 0.19<br>(0.12, 0.30)                 | 0.10<br>(0.06, 0.14)                         | 265                  | 0.47<br>(0.36, 0.61)             |
| BNT162b2        | 55-64             | 0.06<br>(0.02, 0.17)                                          | 87                                    | 0.16<br>(0.10, 0.26)                 | 0.10<br>(0.06, 0.15)                         | 265                  | 0.37<br>(0.27, 0.50)             |
| BNT162b2        | ≥65               | 0.04<br>(0.01, 0.13)                                          | 83                                    | 0.14<br>(0.09, 0.22)                 | 0.25<br>(0.15, 0.43)                         | 255                  | 0.28<br>(0.21, 0.38)             |
| mRNA-1273       | 20-44             | <0.01<br>(<0.01, 0.05)                                        | 88                                    | 0.10<br>(0.07, 0.16)                 | 0.07<br>(0.05, 0.10)                         | 263                  | 0.41<br>(0.33, 0.51)             |
| mRNA-1273       | 45-54             | 0.03<br>(<0.01, 0.16)                                         | 68                                    | 0.11<br>(0.06, 0.19)                 | 0.08<br>(0.05, 0.14)                         | 253                  | 0.34<br>(0.26, 0.44)             |
| mRNA-1273       | 55-64             | <0.01<br>(<0.01, 0.11)                                        | 68                                    | 0.07<br>(0.04, 0.13)                 | 0.12<br>(0.07, 0.20)                         | 254                  | 0.24<br>(0.18, 0.33)             |
| mRNA-1273       | ≥65               | 0.12<br>(0.05, 0.30)                                          | 55                                    | 0.04<br>(0.02, 0.07)                 | 0.25<br>(0.13, 0.48)                         | 244                  | 0.21<br>(0.16, 0.28)             |
| Ad26.COVS.S     | 20-44             | 0.90<br>(0.57, 1.41)                                          | 60                                    | 0.30<br>(0.19, 0.48)                 | 0.64<br>(0.49, 0.82)                         | 217                  | 0.47<br>(0.36, 0.62)             |
| Ad26.COVS.S     | 45-54             | 0.30<br>(0.12, 0.75)                                          | 52                                    | 0.42<br>(0.24, 0.75)                 | 0.68<br>(0.43, 1.05)                         | 216                  | 0.46<br>(0.32, 0.65)             |
| Ad26.COVS.S     | 55-64             | 0.52<br>(0.23, 1.18)                                          | 49                                    | 0.22<br>(0.12, 0.39)                 | 0.76<br>(0.46, 1.25)                         | 215                  | 0.32<br>(0.22, 0.47)             |
| Ad26.COVS.S     | ≥65               | 1.34<br>(0.35, 5.11)                                          | 43                                    | 0.65<br>(0.33, 1.27)                 | 0.49<br>(0.17, 1.39)                         | 189                  | 0.51<br>(0.39, 0.66)             |

OR=odds ratio; CI=confidence interval; NA=Not applicable

<sup>a</sup> OR for prior COVID-19 vaccination and SARS-CoV-2 test positivity. ORs adjusted for race, ethnicity, sex, testing site state, testing site census tract SVI, and calendar date as a continuous variable. Tests with missing SVI excluded from adjusted analyses.

<sup>b</sup> Pre-Delta period: March 13-May 29, 2021.

<sup>c</sup> Day 14 after second dose for BNT162b2 and mRNA-1273 or after the dose for Ad26.COVS.S.

<sup>d</sup> End day defined as the day after which ≤10 cases remained for each product-, age-group- and period-specific model.

<sup>e</sup> Delta period: July 18-October 17, 2021.

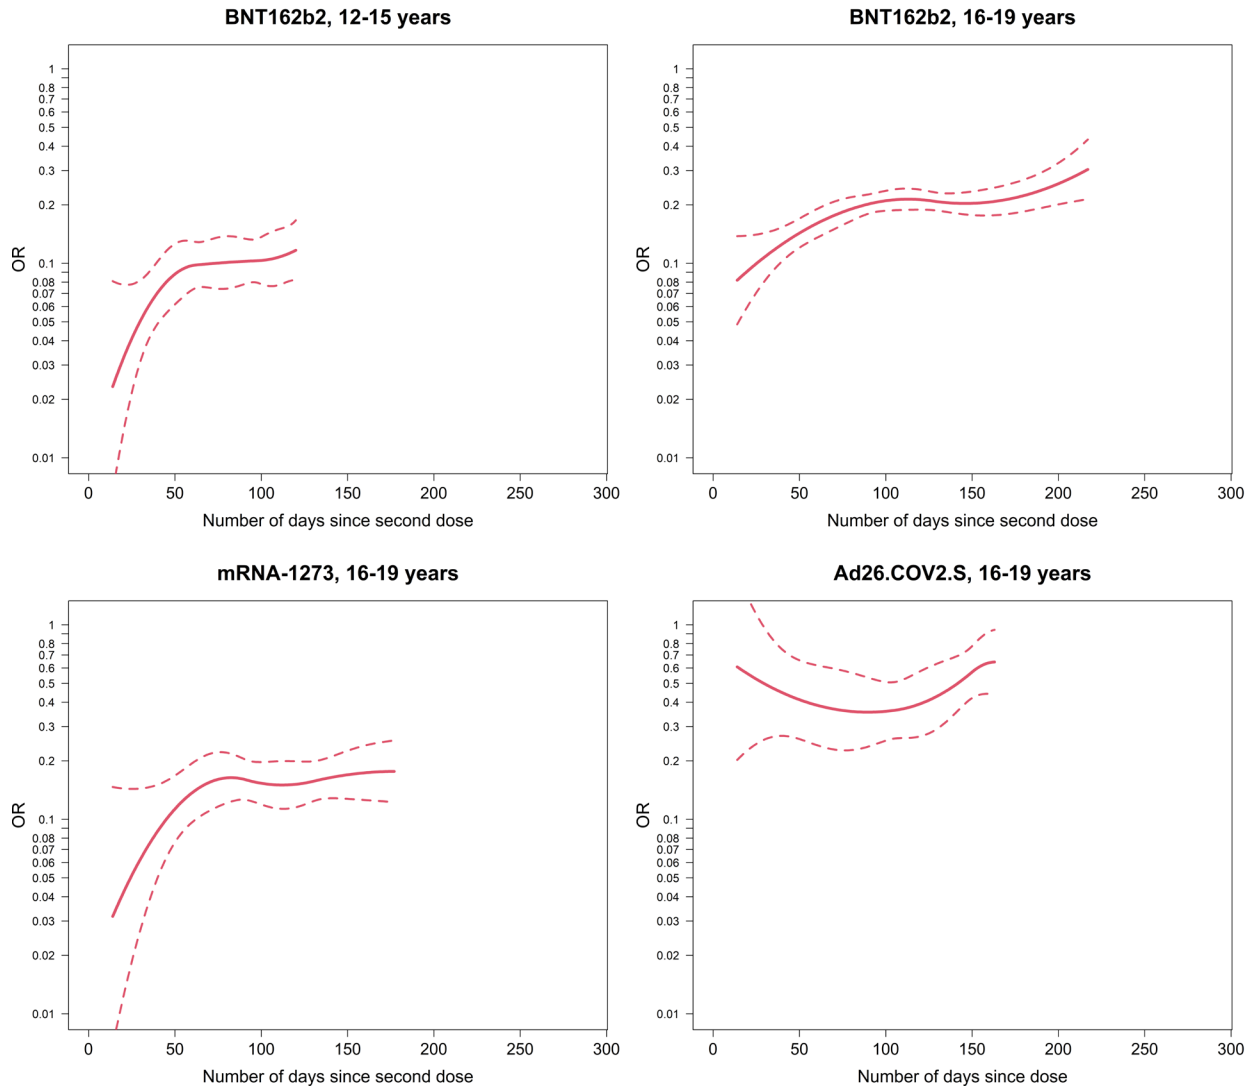

**eFigure 4. Sensitivity analysis excluding pharmacy chain C: association of COVID-19 vaccination and symptomatic infection by day since vaccination by adolescent age group and vaccine product**

a. BNT162b2 vaccine for adolescents ages 12-15 years. b. BNT162b2 vaccine for adolescents ages 16-19 years. c. mRNA-1273 vaccine for adolescents ages 16-19 years. d. Ad26.COV2.S vaccine for adolescents ages 16-19 years.

Panels display odds ratios (OR), plotted on a logarithmic scale, for prior COVID-19 vaccination (by vaccine product) and SARS-CoV-2 test positivity by day since vaccination (starting at day 14 since second mRNA dose or Ad26.COV2.S dose) in the Delta period (July 18-October 17, 2021) with 95% confidence intervals. OR adjusted for race, ethnicity, sex, testing site state, testing site census tract social vulnerability index (SVI), and calendar date as a continuous variable. Tests with missing SVI excluded from adjusted analyses. For this figure, the presented (fitted) curves were truncated on the day after which  $\leq 10$  cases remained for each product-and age-group-specific model, beyond which CIs widened.

mRNA-1273 and Ad26.COVS COVID-19 vaccines were only authorized for those ages  $\geq 18$  years during the Delta period. The y-axis was truncated at 1.0, and data points above 1.0 are not shown.

**ORs <sup>a</sup> (95% CI) for day 14 and end day for eFigure 4.**

| Vaccine product | Age group (years) | Delta period <sup>b</sup> day 14 <sup>c</sup> OR (95% CI) | Delta period end day <sup>d</sup> | Delta period end day OR (95% CI) |
|-----------------|-------------------|-----------------------------------------------------------|-----------------------------------|----------------------------------|
| BNT162b2        | 12-15             | 0.02 (0.01, 0.08)                                         | 120                               | 0.12 (0.08, 0.17)                |
| BNT162b2        | 16-19             | 0.08 (0.05, 0.14)                                         | 217                               | 0.30 (0.21, 0.43)                |
| mRNA-1273       | 16-19             | 0.03 (0.01, 0.15)                                         | 177                               | 0.18 (0.12, 0.25)                |
| Ad26.COVS       | 16-19             | 0.61 (0.20, 1.83)                                         | 163                               | 0.64 (0.44, 0.94)                |

OR=odds ratio; CI=confidence interval; NA=Not applicable

<sup>a</sup> OR for prior COVID-19 vaccination and SARS-CoV-2 test positivity. ORs adjusted for race, ethnicity, sex, testing site state, testing site census tract SVI, and calendar date as a continuous variable. Tests with missing SVI excluded from adjusted analyses.

<sup>b</sup> Delta period: July 18-October 17, 2021

<sup>c</sup> Day 14 after second dose for BNT162b2 and mRNA-1273 or after the dose for Ad26.COVS.

<sup>d</sup> End day defined as the day after which  $\leq 10$  cases remained for each product- and age-group-specific model.

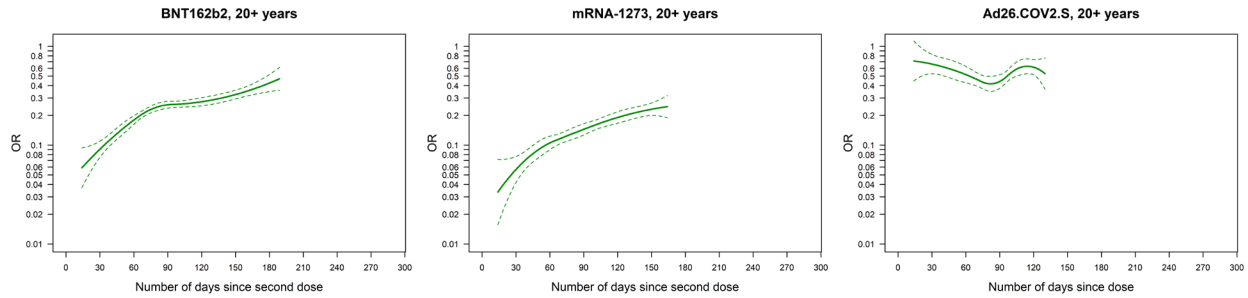

**eFigure 5. Association of COVID-19 vaccination and symptomatic infection by day since vaccination among adults ages  $\geq 20$  years during the intermediate period (May 30-July 17, 2021).** a. BNT162b2 vaccine. b. mRNA-1273 vaccine. c. Ad26.COVS.2 vaccine.

Intermediate period defined as May 30-July 17, 2021. Panels display odds ratios (OR), plotted on a logarithmic scale, for prior COVID-19 vaccination (by vaccine product) and SARS-CoV-2 test positivity by day since vaccination (starting at day 14 since second mRNA dose or Ad26.COVS.2 dose) with 95% confidence intervals (CI). OR adjusted for age group, race, ethnicity, sex, testing site state, testing site census tract social vulnerability index (SVI), and calendar date as a continuous variable. Tests with missing SVI excluded from adjusted analyses. For this figure, the presented (fitted) curves were truncated on the day after which  $\leq 10$  cases remained for each product-specific model, beyond which CIs widened. The y-axis was truncated at 1.0, and data points above 1.0 are not shown.

**Odds ratios (OR)<sup>a</sup> (95% CI) for day 14 and end day for eFigure 5.**

| Vaccine product | Age group (years) | Intermediate period <sup>b</sup> day 14 <sup>c</sup> OR (95% CI) | Intermediate period end day <sup>d</sup> | Intermediate period end day OR (95% CI) |
|-----------------|-------------------|------------------------------------------------------------------|------------------------------------------|-----------------------------------------|
| BNT162b2        | $\geq 20$         | 0.06 (0.04, 0.09)                                                | 189                                      | 0.47 (0.36, 0.61)                       |
| mRNA-1273       | $\geq 20$         | 0.03 (0.02, 0.07)                                                | 164                                      | 0.25 (0.19, 0.32)                       |
| Ad26.COVS.2     | $\geq 20$         | 0.71 (0.45, 1.13)                                                | 130                                      | 0.53 (0.37, 0.76)                       |

OR=odds ratio; CI=confidence interval; NA=Not applicable

<sup>a</sup> OR for prior COVID-19 vaccination and SARS-CoV-2 test positivity. ORs adjusted for age group, race, ethnicity, sex, testing site state, testing site census tract SVI, and calendar date as a continuous variable. Tests with missing SVI excluded from adjusted analyses.

<sup>b</sup> Intermediate period: May 30-July 17, 2021.

<sup>c</sup> Day 14 after second dose for BNT162b2 and mRNA-1273 or after the dose for Ad26.COVS.2.

<sup>d</sup> End day defined as the day after which  $\leq 10$  cases remained for each product-specific model.



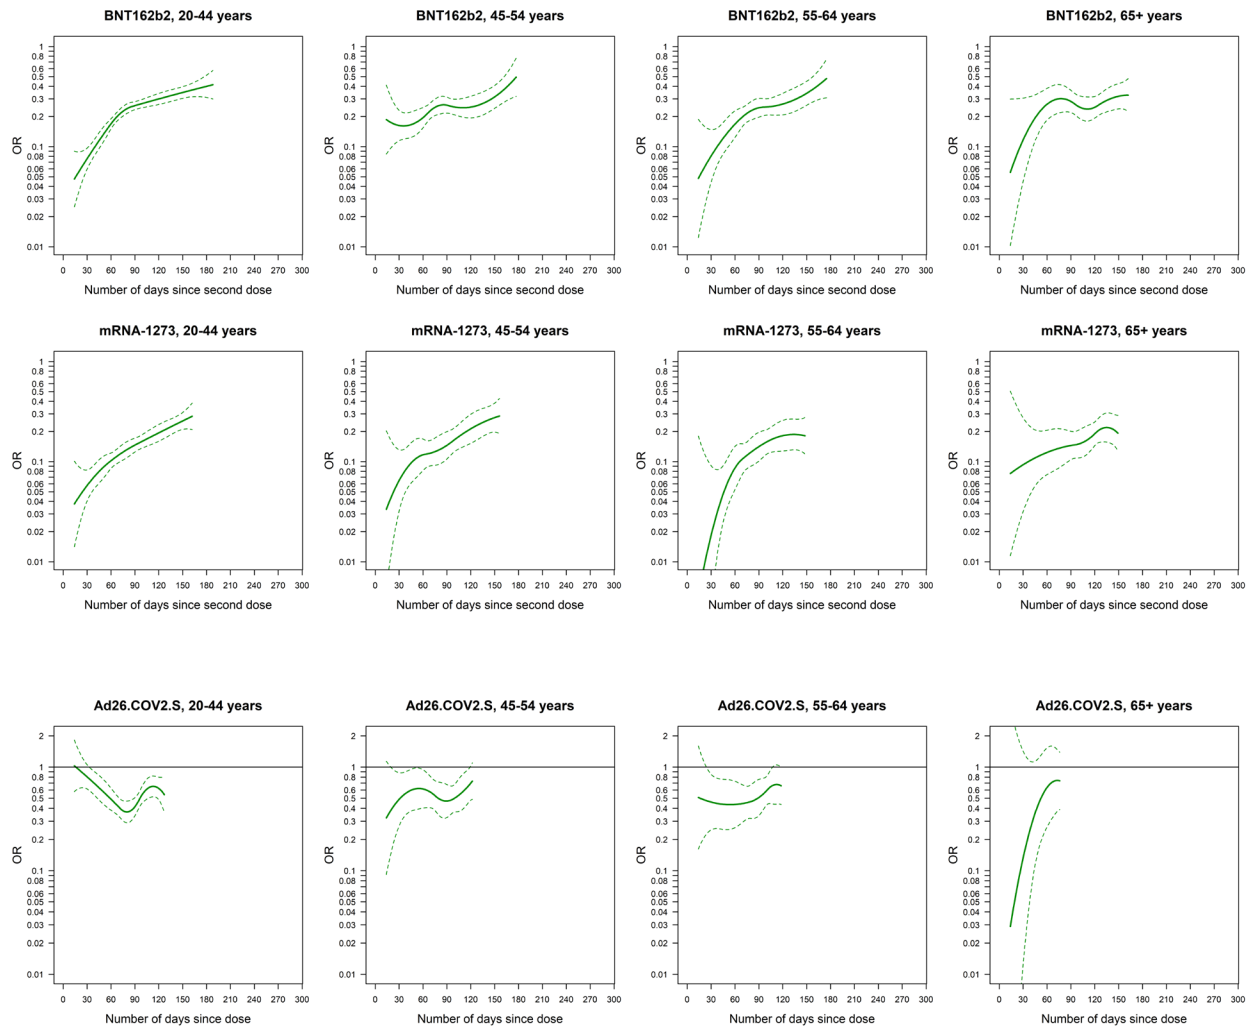

**eFigure 6. Association of COVID-19 vaccination and symptomatic infection by day since vaccination by adult age group and vaccine product during the intermediate period (May 30-July 17, 2021).**

a. BNT162b2 vaccine for adults ages 20-44 years. b. BNT162b2 vaccine for adults ages 45-54 years. c. BNT162b2 vaccine for adults ages 55-64 years. d. BNT162b2 vaccine for adults ages  $\geq 65$  years. e. mRNA-1273 vaccine for adults ages 20-44 years. f. mRNA-1273 vaccine for adults ages 45-54 years. g. mRNA-1273 vaccine for adults ages 55-64 years. h. mRNA-1273 vaccine for adults ages  $\geq 65$  years. i. Ad26.COVS vaccine for adults ages 20-44 years. j. Ad26.COVS vaccine for adults ages 45-54 years. k. Ad26.COVS vaccine for adults ages 55-64 years. l. Ad26.COVS vaccine for adults ages  $\geq 65$  years.

Intermediate period defined as May 30-July 17, 2021. Panels display odds ratios (OR), plotted on a logarithmic scale, for prior COVID-19 vaccination (by vaccine product) and SARS-CoV-2 test positivity by day since vaccination (starting at day 14 since second mRNA dose or Ad26.COVS dose) with 95% confidence intervals (CI). OR adjusted for race, ethnicity, sex, testing site state, testing site census tract social vulnerability index (SVI), and calendar date as a continuous variable. Tests with missing SVI excluded from adjusted analyses. For this figure, the presented (fitted) curves were truncated on the

day after which ≤10 cases remained for each product-and age-group-specific model, beyond which CIs widened. For Ad26.COVS.S (panels i-l), the Y-axis was truncated at 2.0, and ORs above 2.0 are not shown.

**Odds ratios (ORs) <sup>a</sup> (95% CI) for day 14 and end day for eFigure 6.**

| Vaccine product | Age group (years) | Intermediate period <sup>b</sup> day 14 <sup>c</sup> OR (95% CI) | Intermediate period end day <sup>d</sup> | Intermediate period end day OR (95% CI) |
|-----------------|-------------------|------------------------------------------------------------------|------------------------------------------|-----------------------------------------|
| BNT162b2        | 20-44             | 0.05 (0.03, 0.09)                                                | 188                                      | 0.42 (0.30, 0.58)                       |
| BNT162b2        | 45-54             | 0.19 (0.08, 0.41)                                                | 177                                      | 0.49 (0.32, 0.77)                       |
| BNT162b2        | 55-64             | 0.05 (0.01, 0.19)                                                | 175                                      | 0.48 (0.31, 0.75)                       |
| BNT162b2        | ≥65               | 0.06 (0.01, 0.30)                                                | 162                                      | 0.33 (0.22, 0.48)                       |
| mRNA-1273       | 20-44             | 0.04 (0.01, 0.10)                                                | 162                                      | 0.28 (0.21, 0.38)                       |
| mRNA-1273       | 45-54             | 0.03 (0.01, 0.20)                                                | 156                                      | 0.29 (0.19, 0.43)                       |
| mRNA-1273       | 55-64             | <0.01 (<0.01, 0.18)                                              | 148                                      | 0.18 (0.12, 0.28)                       |
| mRNA-1273       | ≥65               | 0.08 (0.01, 0.51)                                                | 149                                      | 0.19 (0.13, 0.29)                       |
| Ad26.COVS.S     | 20-44             | 1.03 (0.58, 1.82)                                                | 127                                      | 0.54 (0.36, 0.81)                       |
| Ad26.COVS.S     | 45-54             | 0.32 (0.09, 1.13)                                                | 122                                      | 0.73 (0.49, 1.10)                       |
| Ad26.COVS.S     | 55-64             | 0.51 (0.16, 1.59)                                                | 118                                      | 0.66 (0.44, 1.00)                       |
| Ad26.COVS.S     | ≥65               | 0.03 (<0.01, 3.67)                                               | 76                                       | 0.74 (0.39, 1.39)                       |

OR=odds ratio; CI=confidence interval; NA=Not applicable

<sup>a</sup> OR for prior COVID-19 vaccination and SARS-CoV-2 test positivity. ORs adjusted for race, ethnicity, sex, testing site state, testing site census tract SVI, and calendar date as a continuous variable. Tests with missing SVI excluded from adjusted analyses.

<sup>b</sup> Intermediate period: May 30-July 17, 2021.

<sup>c</sup> Day 14 after second dose for BNT162b2 and mRNA-1273 or after the dose for Ad26.COVS.S.

<sup>d</sup> End day defined as the day after which ≤10 cases remained for each product- and age-group-specific model.
